# Supplementary material for: Potential Cancer- and Alzheimer’s Disease-Targeting Phosphodiesterase Inhibitors from Uvaria alba: Insights from In Vitro and Consensus Virtual Screening
Source: PubMed Central journal article supplement — ACS Omega. 2021 Mar 16;6(12):8403–17. doi: 10.1021/acsomega.1c00137 (PMC8015132; doi:10.1021/acsomega.1c00137), 2021-03-16
Supplement: ao1c00137_si_001.pdf [file ao1c00137_si_001.pdf]

# SUPPLEMENTARY MATERIAL FOR

## Potential Cancer and Alzheimer's Disease Targeting Phosphodiesterase Inhibitors from *Uvaria alba*: Insights from *In Vitro* and Consensus Virtual Screening

Mark Tristan Quimque<sup>a,b,c,†</sup>, Kin Israel Notarte<sup>a,d,†</sup>, Arianne Letada<sup>a,b,†</sup>, Rey Arturo Fernandez<sup>a</sup>,  
Delfin Yñigo Pilapil IV<sup>a,e</sup>, Kirstin Rhys Pueblos<sup>a,b,c</sup>, Jay Carl Agbay<sup>c,f</sup>, Hans-Martin Dahse<sup>g</sup>,  
Arlette Wenzel-Storjohann<sup>h</sup>, Deniz Tasdemir<sup>h</sup>, Abbas Khan<sup>j</sup>,  
Dong-Qing Wei<sup>j,k</sup> and Allan Patrick G. Macabeo<sup>a,\*</sup>

<sup>a</sup>Laboratory of Organic Reactivity, Discovery & Synthesis (LORDS), Research Center for Natural & Applied Sciences, University of Santo Tomas, 1015 España, Manila, Philippines

<sup>b</sup>The Graduate School, University of Santo Tomas, 1015 España, Manila, Philippines

<sup>c</sup>Department of Chemistry, College of Science and Mathematics, Mindanao State University-Iligan Institute of Technology, Tibanga, 9200 Iligan City, Philippines

<sup>d</sup>Faculty of Medicine & Surgery, University of Santo Tomas, 1015 España, Manila, Philippines

<sup>e</sup>Department of Biological Sciences, College of Science, University of Santo Tomas, 1015 España, Manila, Philippines

<sup>f</sup>Philippine Science High School – Central Mindanao Campus, 9217 Balo-i, Lanao del Norte, Philippines

<sup>g</sup>Leibniz-Institute for Natural Product Research and Infection Biology, Hans-Knöll-Institute (HKI), D-07745 Jena, Germany

<sup>h</sup>GEOMAR Centre for Marine Biotechnology (GEOMAR-Biotech), Research Unit, Marine Natural Products Chemistry, GEOMAR Helmholtz Centre for Ocean Research Kiel, Am Kiel-Kanal, Kiel 24106, Germany

<sup>j</sup>Department of Bioinformatics and Biostatistics, State Key Laboratory of Microbial Metabolism, Shanghai Jiao Tong University, 800 Dongchuan Road Shanghai, Minhang District, China, 200240

<sup>k</sup>Peng Cheng Laboratory, Vanke Cloud City Phase I Building 8, Xili Street, Nanshan District, Shenzhen, Guangdong, 518055, P.R. China

†These authors contributed equally to this work.

\*Corresponding author: [agmacabeo@ust.edu.ph](mailto:agmacabeo@ust.edu.ph) / [allanpatrick\\_m@yahoo.com](mailto:allanpatrick_m@yahoo.com); Tel No. +632-34061611 local 4057; Fax No. +632-87314-031.

# Table of Contents

|                                                                                                                                                                                                                          | Page |
|--------------------------------------------------------------------------------------------------------------------------------------------------------------------------------------------------------------------------|------|
| <b>Figure S1.</b> LC chemical profile of <i>Uvaria alba</i> DCM sub-extract (positive-ion mode MS detection).                                                                                                            | S4   |
| <b>Figure S2.</b> LC chemical profile of <i>Uvaria alba</i> DCM sub-extract (negative-ion mode MS detection).                                                                                                            | S5   |
| <b>Figure S3.</b> Optimized geometries of the reactants (grandifloracin ( <b>15</b> ) and Cys151 tripeptide ( <b>19</b> )).                                                                                              | S6   |
| <b>Figure S4.</b> Optimized geometry of TS1.                                                                                                                                                                             | S7   |
| <b>Figure S5.</b> Optimized geometry of grandifloracin ( <b>15</b> )-Cys151 enol adduct ( <b>20</b> ).                                                                                                                   | S8   |
| <b>Figure S6.</b> Optimized geometry of TS2.                                                                                                                                                                             | S9   |
| <b>Figure S7.</b> Optimized geometry of grandifloracin ( <b>15</b> )-Cys151 keto adduct ( <b>21</b> ).                                                                                                                   | S10  |
| <b>Figure S8.</b> Root mean square fluctuation (RMSF) of selected top-scoring protein-ligand complexes. The x-axis shows the total residues while RMSF value in Å is given on y-axis.                                    | S11  |
| <b>Figure S9.</b> Radius of gyration of all the four ligands bound to different receptors. The y-axis shows the Rg value in Å while the x-axis shows the frames.                                                         | S12  |
| <b>Figure S10.</b> Structures of target proteins: (A) phosphodiesterase 4 B2B, PDE4 B2B, (B) acetylcholinesterase, AChE, (C) ubiquitin specific peptidase 14, USP14, (D) KEAP-1 Kelch domain, and (E) KEAP-1 BTB domain. | S13  |
| <b>Table S1.</b> Putative compounds <b>1–18</b> identified from the DCM sub-extract and their associated biological activities.                                                                                          | S14  |
| <b>Table S2.</b> Molecular docking scores and binding site interactions of <i>U. alba</i> metabolites <b>1–18</b> against PDE4 B2B (PDB:1RO6)                                                                            | S16  |
| <b>Table S3.</b> Molecular docking scores and binding site interactions of <i>U. alba</i> metabolites <b>1–18</b> against acetylcholinesterase (PDB:4EY6)                                                                | S17  |
| <b>Table S4.</b> Molecular docking scores and binding site interactions of <i>U. alba</i> metabolites <b>1–18</b> against USP14 (PDB:6IIM)                                                                               | S18  |
| <b>Table S5.</b> Molecular docking scores and binding site interactions of <i>U. alba</i> metabolites <b>1–18</b> against Keap-1 Kelch domain (PDB:4L7B)                                                                 | S19  |
| <b>Table S6.</b> Molecular docking scores and binding site interactions of <i>U. alba</i> metabolites <b>1–18</b> against Keap-1 BTB domain (PDB:5DAD)                                                                   | S20  |
| <b>Table S7.</b> Summary of energies of HOMO, LUMO, electronic chemical potential $\mu$ , hardness $\eta$ and global electrophilicity $\omega$ of the electrophilic <i>U. alba</i> secondary metabolites.                | S21  |
| <b>Table S8.</b> Energetics of the reaction species calculated at the B3LYP/6-31G** level                                                                                                                                | S22  |

of theory with the PCM water solvation model.

|                                                                                                                                                                      |     |
|----------------------------------------------------------------------------------------------------------------------------------------------------------------------|-----|
| <b>Table S9.</b> Cartesian coordinates of the optimized structure of grandifloracin ( <b>15</b> ) calculated at B3LYP/6-31G**(d,p)                                   | S23 |
| <b>Table S10.</b> Cartesian coordinates of the optimized structure of Cys151 tripeptide (Lys150-Cys151-Val152) calculated at B3LYP/6-31G**(d,p)                      | S25 |
| <b>Table S11.</b> Cartesian coordinates of the optimized structure of TS1 calculated at B3LYP/6-31G**(d,p)                                                           | S27 |
| <b>Table S12.</b> Cartesian coordinates of the optimized structure of grandifloracin ( <b>15</b> )-Cys151 enol adduct ( <b>20</b> ) calculated at B3LYP/6-31G**(d,p) | S30 |
| <b>Table S13.</b> Cartesian coordinates of the optimized structure of TS2 calculated at B3LYP/6-31G**(d,p)                                                           | S33 |
| <b>Table S14.</b> Cartesian coordinates of the optimized structure of grandifloracin ( <b>15</b> )-Cys151 keto adduct ( <b>21</b> ) calculated at B3LYP/6-31G**(d,p) | S36 |
| <b>Table S15.</b> Binding energy (kcal/mol) results of the top scoring compounds <b>8, 13, 14, 15</b> and <b>16</b> .                                                | S39 |
| <b>Table S16.</b> Input parameters for molecular dynamics simulation used in this study.                                                                             | S40 |
| <b>Table S17.</b> The hydrogen bonding occupancy of the key residues during the course of simulation.                                                                | S41 |
| <b>Table S18.</b> Lipinski's rule of five for ADME analysis of compounds <b>1–18</b> .                                                                               | S42 |
| <b>Table S19.</b> Predicted toxicity parameters of compounds <b>1–18</b> .                                                                                           | S43 |
| <b>Table S20.</b> Docking grid coordinates and active residues of the protein binding site.                                                                          | S44 |
| <b>Table S21.</b> RMSD analysis of co-crystallized ligand and its re-docked structure.                                                                               | S45 |
| <b>REFERENCES</b>                                                                                                                                                    | S47 |

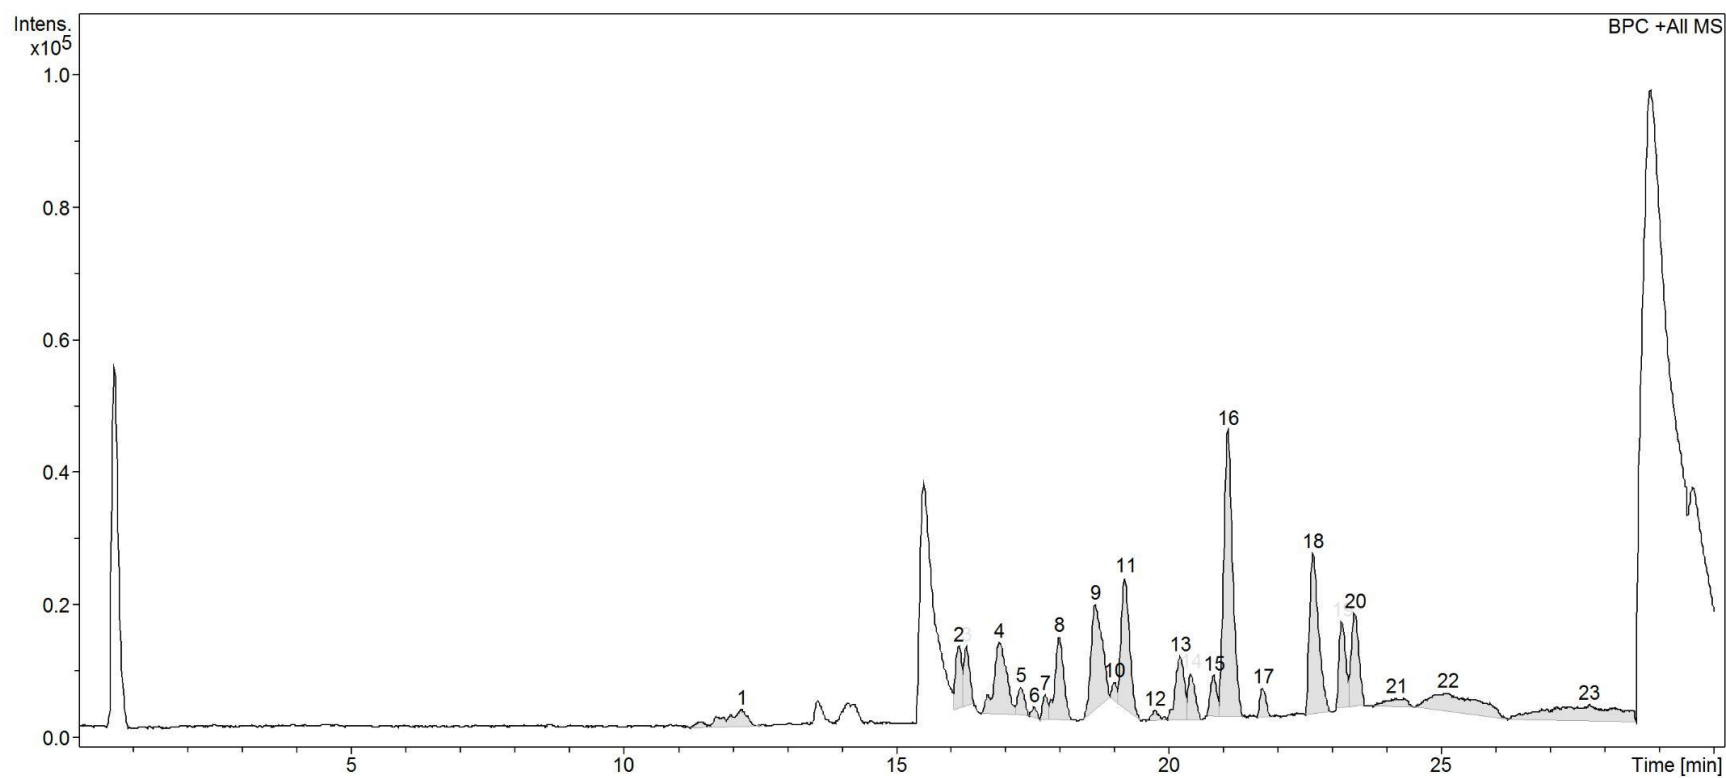

**Figure S1.** LC chemical profile of *Uvaria alba* DCM sub-extract (positive-ion mode MS detection).

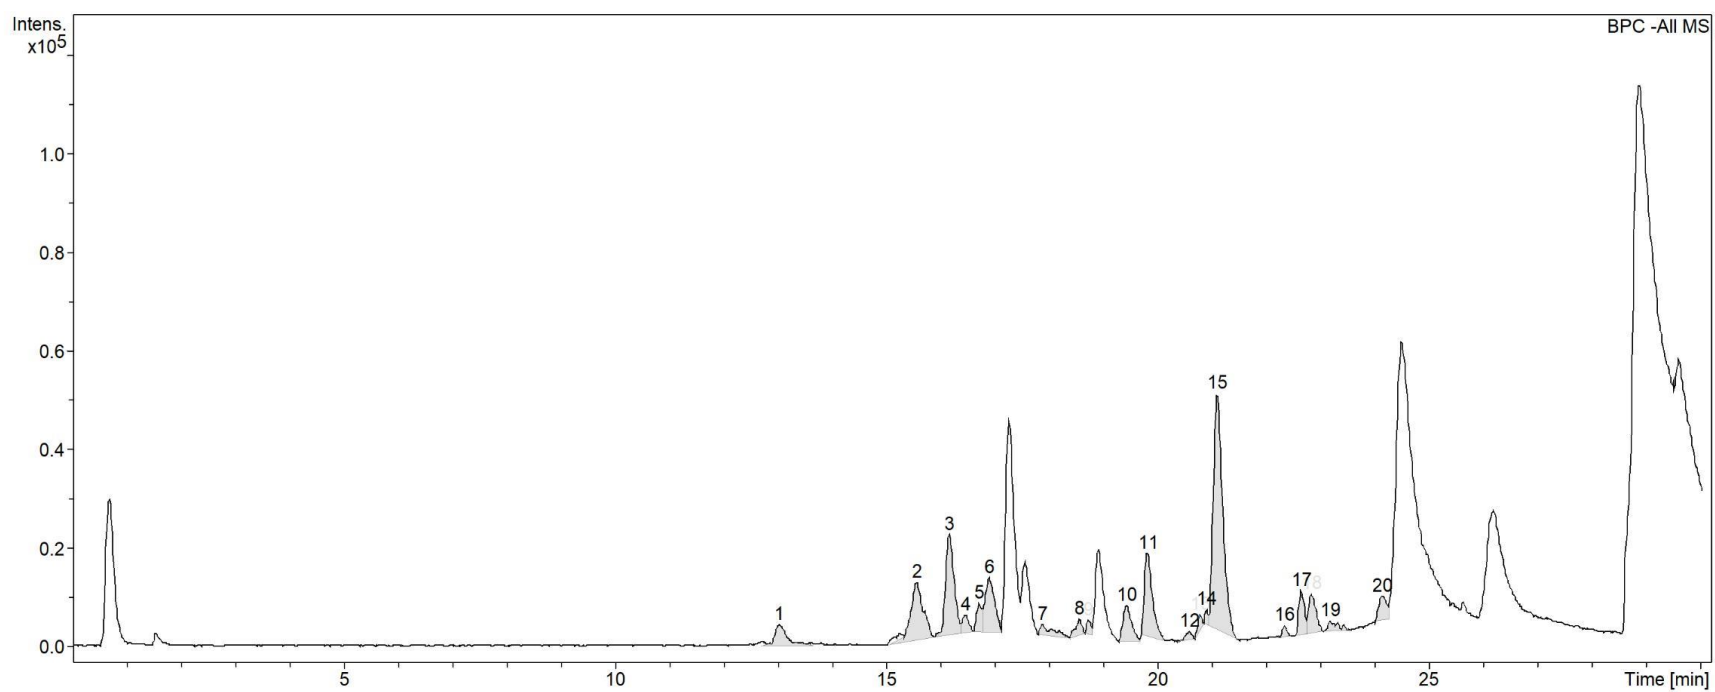

**Figure S2.** LC chemical profile of *Uvaria alba* DCM sub-extract (negative-ion mode MS detection).

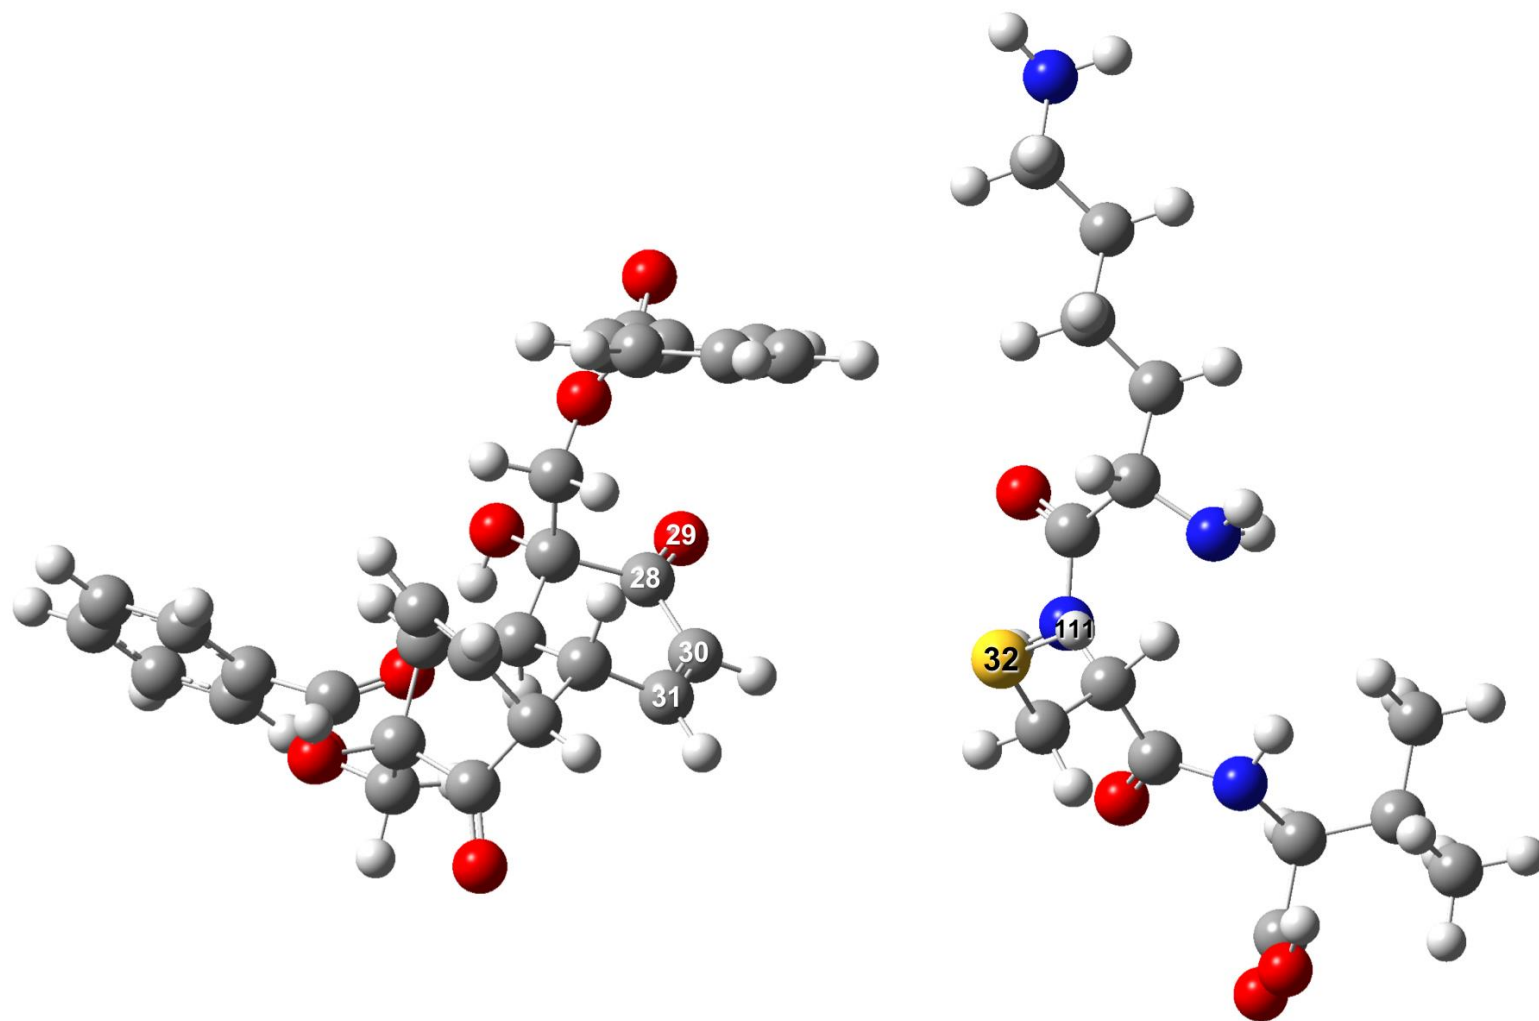

**Figure S3.** Optimized geometries of the reactants (grandifloracin (**15**) and Cys151 tripeptide (**19**)).

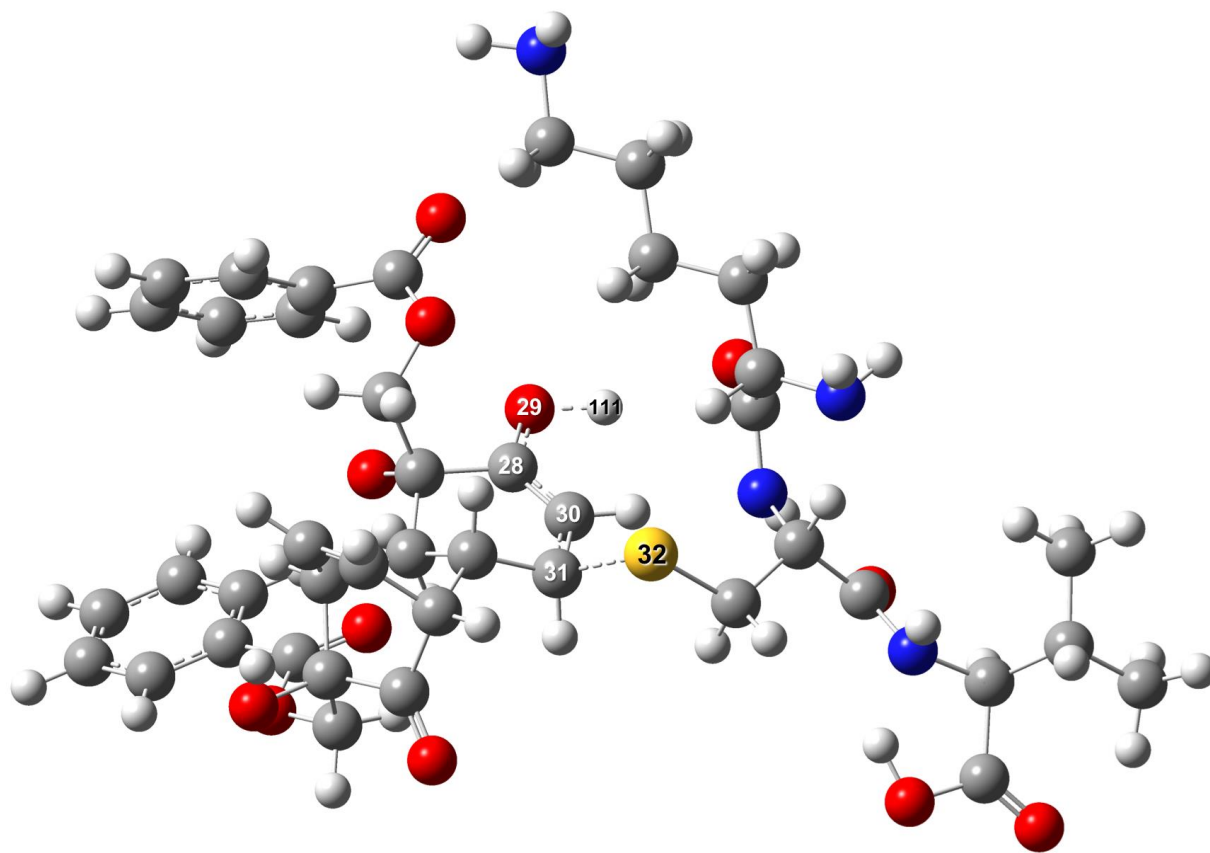

**Figure S4.** Optimized geometry of TS1.

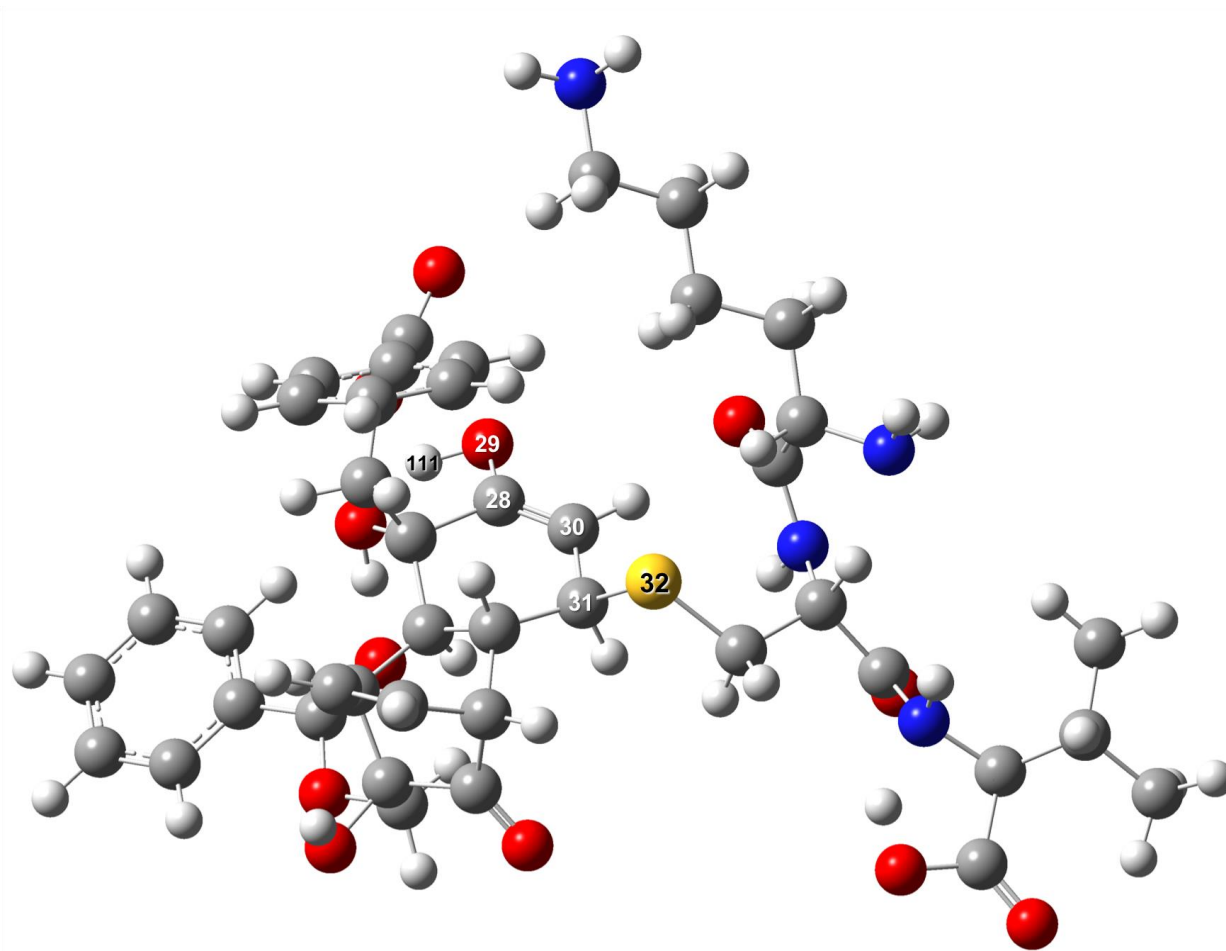

**Figure S5.** Optimized geometry of grandifloracin (15)-Cys151 enol adduct (20).



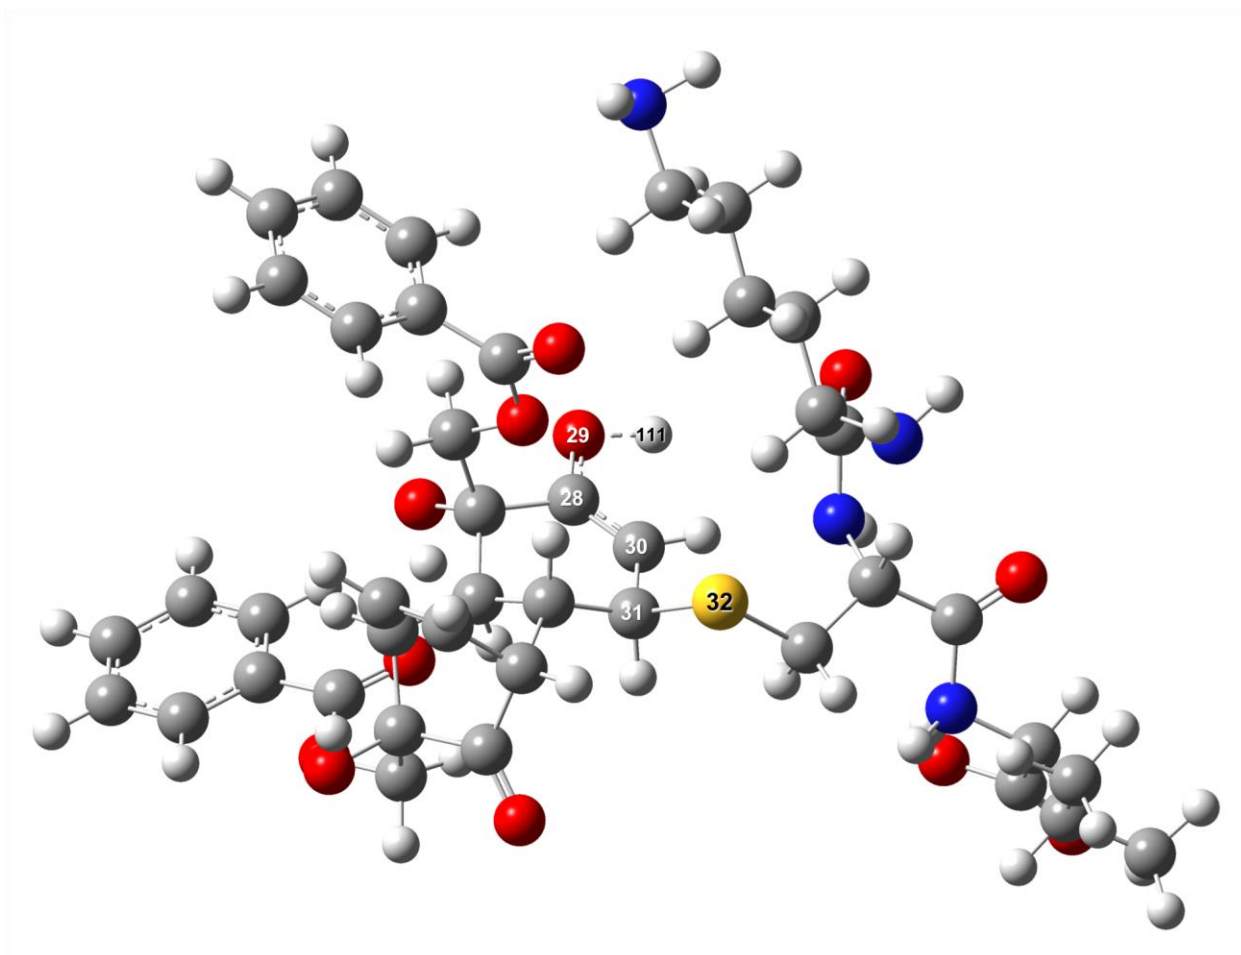

**Figure S6.** Optimized geometry of TS2.

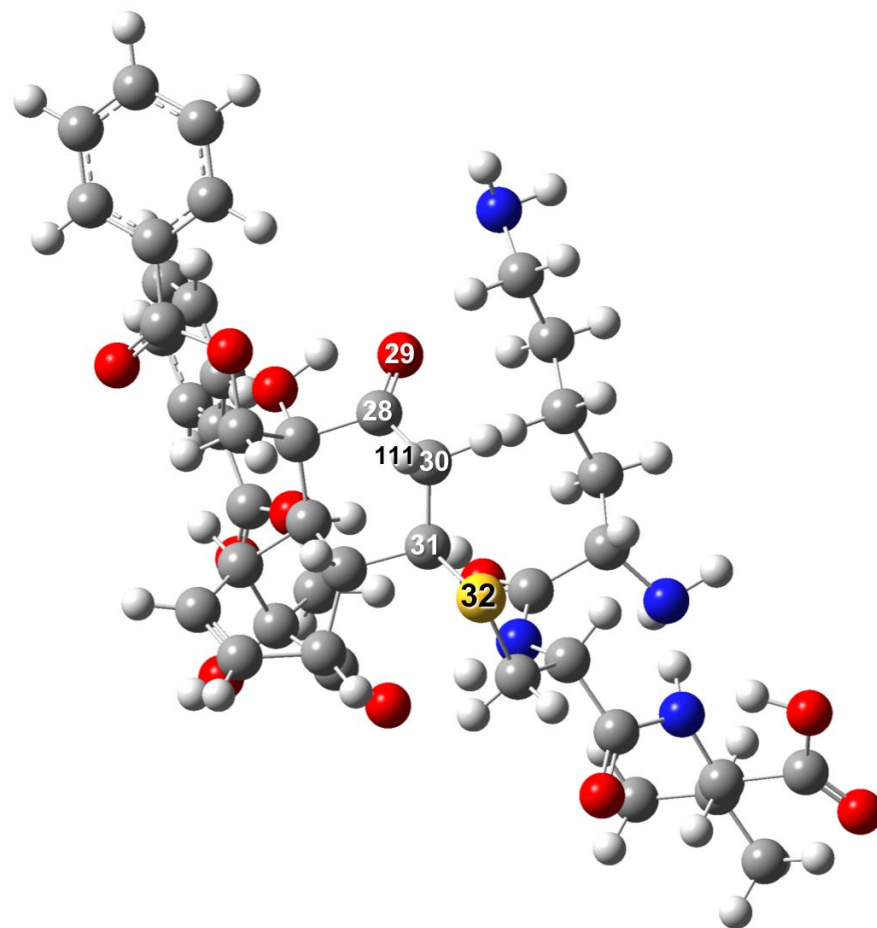

**Figure S7.** Optimized geometry of grandifloracin (15)-Cys151 keto adduct (21).

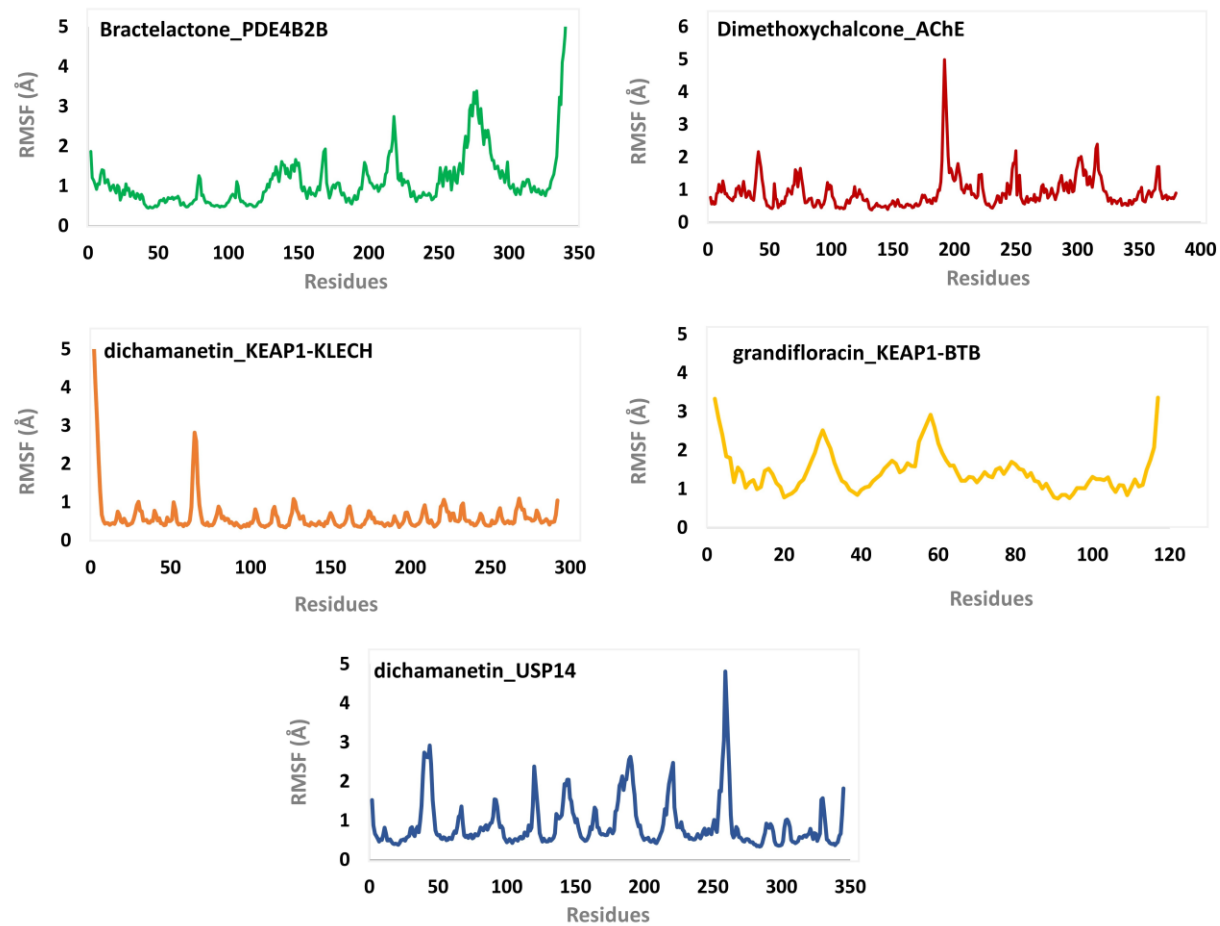

**Figure S8.** Root mean square fluctuation (RMSF) of selected top-scoring protein-ligand complexes. The x-axis shows the total residues while RMSF value in Å is given on y-axis.

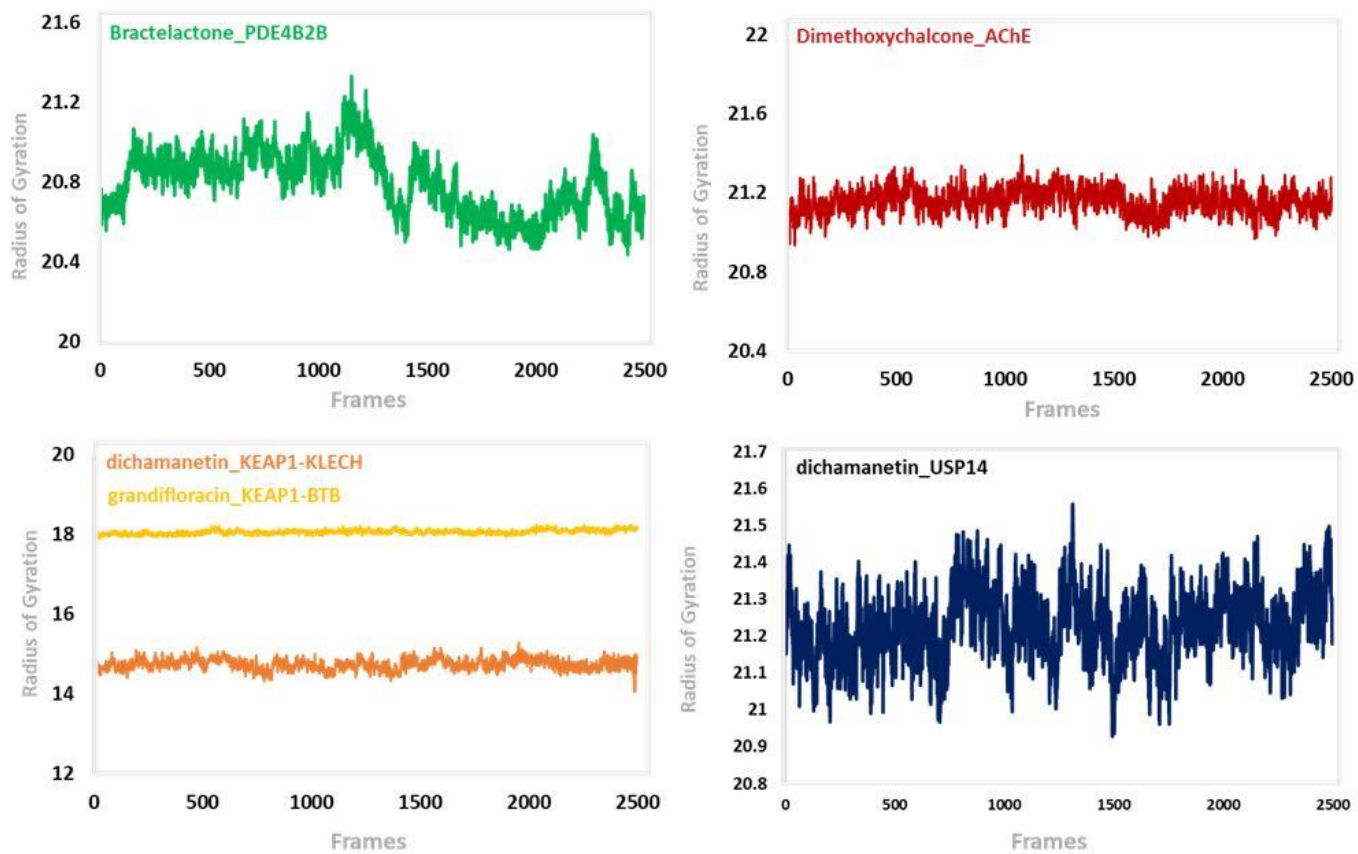

**Figure S9.** Radius of gyration of all the four ligands bound to different receptors. The y-axis shows the Rg value in Å while the x-axis shows the frames.

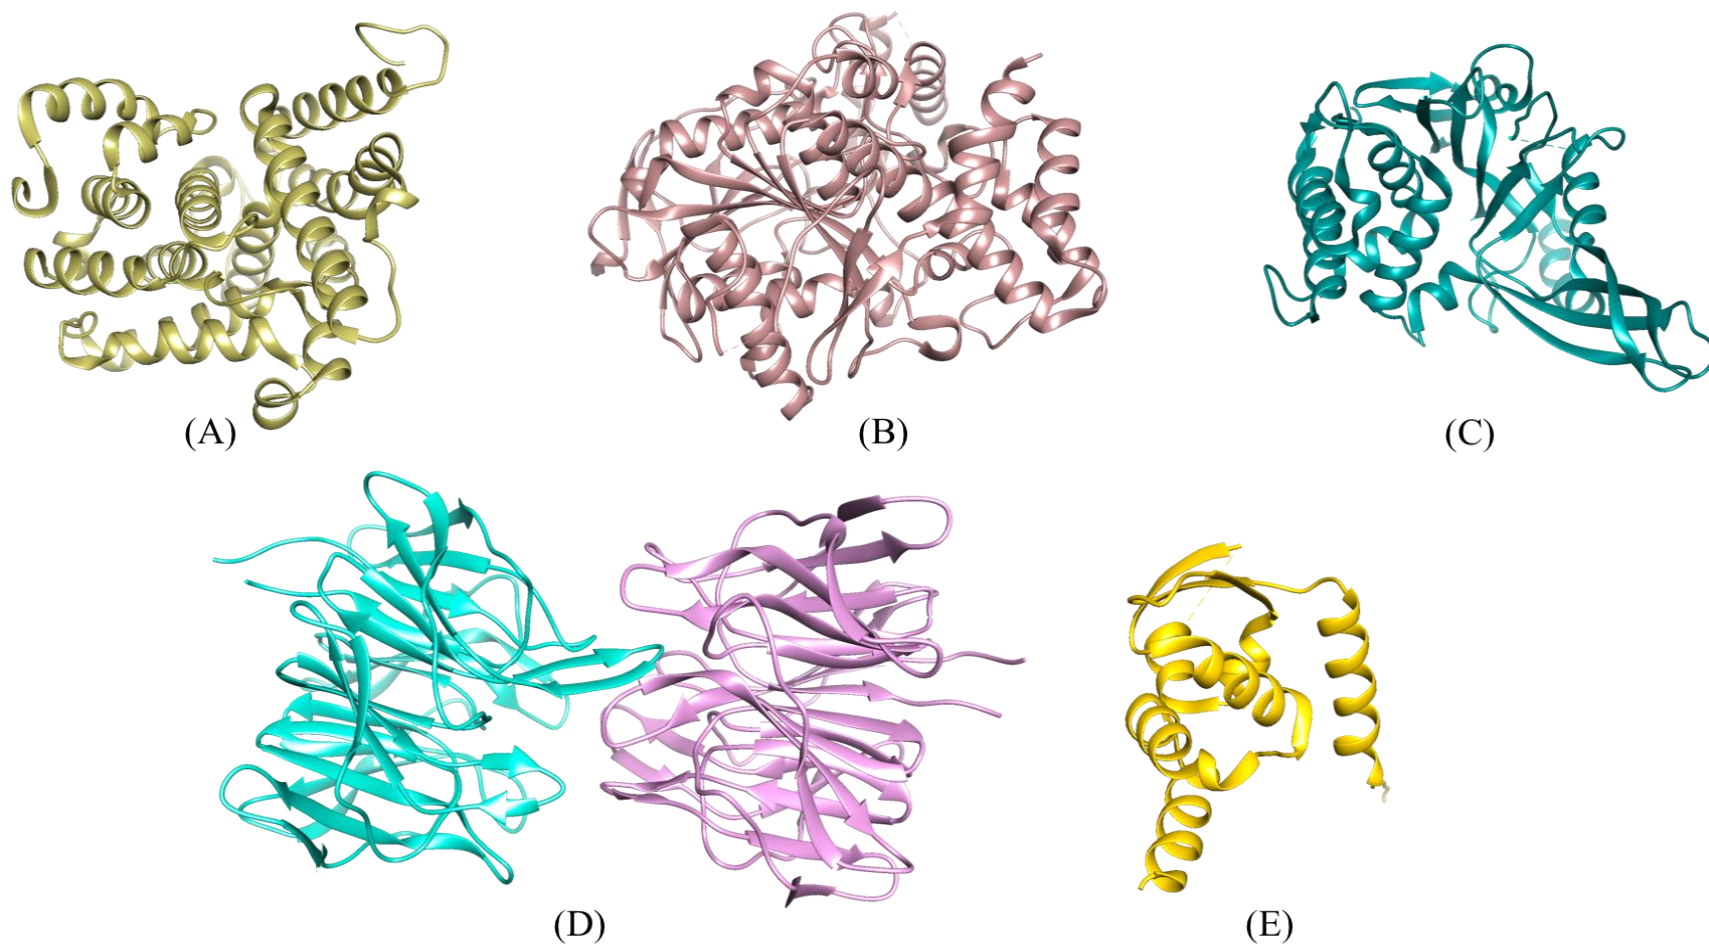

**Figure S10.** Structures of target proteins: (A) phosphodiesterase 4 B2B, PDE4 B2B, (B) acetylcholinesterase, AChE, (C) ubiquitin specific peptidase 14, USP14, (D) KEAP-1 Kelch domain, and (E) KEAP-1 BTB domain.

**Table S1.** Putative compounds **1–18** identified from the DCM sub-extract and their associated biological activities.

| Compound | Retention Time ( $t_R$ , min) | Molecular ion ( $m/z$ )         | Calculated Mass | Molecular Formula                                   | Compound Identity                                                | Reported Biological Activity                                                                          |
|----------|-------------------------------|---------------------------------|-----------------|-----------------------------------------------------|------------------------------------------------------------------|-------------------------------------------------------------------------------------------------------|
| <b>1</b> | 13.0                          | 265.0483<br>[M-H] <sup>-</sup>  | 265.2482        | C <sub>16</sub> H <sub>10</sub> O <sub>4</sub>      | 7-Benzoyloxy-2 <i>H</i> -1-benzopyran-2-one                      | No reported activity                                                                                  |
| <b>2</b> | 16.2                          | 409.1246<br>[M+H] <sup>+</sup>  | 408.4007        | C <sub>23</sub> H <sub>20</sub> O <sub>7</sub>      | Uvaridapoxide A                                                  | Antiausterity and cytotoxic activities in human pancreatic cancer PANC-1 <sup>1</sup>                 |
| <b>3</b> | 16.4                          | 385.1295<br>[M-H] <sup>-</sup>  | 386.3952        | C <sub>21</sub> H <sub>22</sub> O <sub>7</sub>      | Microcarpin A                                                    | No reported activity                                                                                  |
| <b>4</b> | 16.5                          | 385.1294<br>[M-H] <sup>-</sup>  | 386.3952        | C <sub>21</sub> H <sub>22</sub> O <sub>7</sub>      | Microcarpin B                                                    | No reported activity                                                                                  |
| <b>5</b> | 16.7                          | 325.0679<br>[M+Na] <sup>+</sup> | 325.0691        | C <sub>16</sub> H <sub>14</sub> O <sub>6</sub> Na   | Grandiuarone                                                     | Antitubercular activity; antiproliferative and cytotoxic activities in HeLa and KB-562 <sup>2,3</sup> |
| <b>6</b> | 17.5                          | 311.1852<br>[M+H] <sup>+</sup>  | 311.1283        | C <sub>19</sub> H <sub>19</sub> O <sub>4</sub>      | Uvaridacane A                                                    | Antiausterity and cytotoxic activities in human pancreatic cancer PANC-1 <sup>1</sup>                 |
| <b>7</b> | 18.6                          | 435.1462<br>[M-H] <sup>-</sup>  | 435.4539        | C <sub>25</sub> H <sub>24</sub> O <sub>7</sub>      | Valderramenol A                                                  | Antitubercular activity <sup>2</sup>                                                                  |
| <b>8</b> | 18.7                          | 437.1243<br>[M-H] <sup>-</sup>  | 437.4267        | C <sub>24</sub> H <sub>22</sub> O <sub>8</sub>      | 3-(3,4-Dihydroxybenzyl)-3',4',6-trihydroxy-2,4-dimethoxychalcone | No reported activity                                                                                  |
| <b>9</b> | 19.0                          | 469.1025<br>[M+Na] <sup>+</sup> | 469.8673        | C <sub>23</sub> H <sub>23</sub> ClO <sub>7</sub> Na | Albanol A                                                        | Antitubercular activity; antiproliferative                                                            |

|           |      |                                 |           |                                                   |                               |                                                                                                                   |
|-----------|------|---------------------------------|-----------|---------------------------------------------------|-------------------------------|-------------------------------------------------------------------------------------------------------------------|
|           |      |                                 |           |                                                   |                               | and cytotoxic activities in HeLa and KB-562 <sup>3</sup>                                                          |
| <b>10</b> | 19.2 | 315.1225<br>[M+H] <sup>+</sup>  | 315.3325  | C <sub>18</sub> H <sub>18</sub> O <sub>5</sub>    | Tepanone                      | Cytotoxic activity in triple-negative breast cancer cells and human promyelocytic leukemia HL-60 <sup>4,5</sup>   |
| <b>11</b> | 19.4 | 421.1301<br>[M-H] <sup>-</sup>  | 421.4273  | C <sub>24</sub> H <sub>22</sub> O <sub>7</sub>    | Valderramenol B               | No reported activity                                                                                              |
| <b>12</b> | 19.8 | 377.1378<br>[M+H] <sup>+</sup>  | 377.4019  | C <sub>23</sub> H <sub>21</sub> O <sub>5</sub>    | 5- <i>O</i> -Methylchamanetin | No reported activity                                                                                              |
| <b>13</b> | 19.8 | 527.1720<br>[M-H] <sup>-</sup>  | 527.5492  | C <sub>31</sub> H <sub>28</sub> O <sub>8</sub>    | Cyathosthemine                | No reported activity                                                                                              |
| <b>14</b> | 20.2 | 417.1309<br>[M+H] <sup>+</sup>  | 417.4227  | C <sub>25</sub> H <sub>20</sub> O <sub>6</sub>    | Bractelactone                 | Anti-inflammatory <sup>6</sup>                                                                                    |
| <b>15</b> | 20.4 | 511.1725<br>[M+Na] <sup>+</sup> | 511.13687 | C <sub>28</sub> H <sub>24</sub> O <sub>8</sub> Na | Grandifloracin                | Antiausterity activity against human pancreatic cancer PANC- <sup>7</sup>                                         |
| <b>16</b> | 20.8 | 469.1642<br>[M+H] <sup>+</sup>  | 469.4973  | C <sub>29</sub> H <sub>24</sub> O <sub>6</sub>    | Dichamanetin                  | Cytotoxic against the cancer cells HT-29 (colon), DU145 (prostate), and MDA-MB-231 (breast cancer) <sup>8,9</sup> |
| <b>17</b> | 21.1 | 405.1327<br>[M+H] <sup>+</sup>  | 405.8488  | C <sub>21</sub> H <sub>22</sub> ClO <sub>6</sub>  | Albanol B                     | Antitubercular activity; antiproliferative and cytotoxic activities in HeLa and KB-562 <sup>3</sup>               |
| <b>18</b> | 21.1 | 435.1454<br>[M-H] <sup>-</sup>  | 435.4538  | C <sub>25</sub> H <sub>24</sub> O <sub>7</sub>    | Cyathoviridine                | Cytotoxic in KB cells <sup>10</sup>                                                                               |

**Table S2.** Molecular docking scores and binding site interactions of *U. alba* metabolites **1–18** against PDE4 B2B (PDB:1RO6).

| <b>Cpd</b> | <b>Binding Energy<br/>(kcal/mol)</b> | <b>Interacting Amino Acids<br/>(non-van der Waals)</b>                            |
|------------|--------------------------------------|-----------------------------------------------------------------------------------|
| 1          | -8.7                                 | Ile336, Gln369, Phe372, Ile376                                                    |
| 2          | -7.9                                 | His160, Asp201, Met273, Ile336, Phe372                                            |
| 3          | -8.5                                 | Tyr159, His160, His164, Met273, Pro322, Ile336, Phe340, Met 357,<br>Phe372        |
| 4          | -8.7                                 | His160, Pro322, Ile336, Phe340, Phe372,                                           |
| 5          | -7.8                                 | Tyr159, Ile336, Phe372                                                            |
| 6          | -8.7                                 | His234, Leu303, Glu304, Met347, Asp392, Leu393, Asn395, Ile401,<br>Phe414, Phe446 |
| 7          | -9.7                                 | Tyr159, Ser208, Ile336, Phe340, Cys358, Phe372                                    |
| 8          | -9.5                                 | His160, Asp201, Ser208, Met273, Asn321, Ile336, Phe340, Gln369,<br>Phe372         |
| 9          | -8.4                                 | Tyr159, Ser208, Ile336, Phe340, Gln343, Phe372                                    |
| 10         | -8.1                                 | Tyr159, Met273, Asp318, Leu319, Pro322, Tyr329, Ile336, Phe340,<br>Phe372         |
| 11         | -9.3                                 | Ile336, Phe340, Pro356, Cys358                                                    |
| 12         | -9.7                                 | Asp318, Leu319, Pro322, Ile336, Phe340, Met357, Gln369, Phe372                    |
| 13         | -9.9                                 | Tyr159, His160, Met273, Asn209, Ser208, Ile336, Phe340, Gln343,<br>Ser355, Phe372 |
| 14         | -10.1                                | Met273, His276, Leu319, Ile336, Phe340, Met357, Phe372, Ile376                    |
| 15         | -10.2                                | Tyr233, His234, His278, Asn283, Glu304, Met347, Ile410, Phe446                    |
| 16         | -10.2                                | Tyr159, Met273, Pro322, Ile336, Met337, Phe340, Met357, Cys158,<br>Phe372         |
| 17         | -8.1                                 | Tyr159, Asp201, His204, Glu230, Met273, Ile336, Phe372                            |
| 18         | -8.3                                 | Tyr159, His204, Leu229, Glu230, His233, Met273, Ile336, Phe372                    |



**Table S3.** Molecular docking scores and binding site interactions of *U. alba* metabolites **1–18** against acetylcholinesterase (PDB:4EY6).

| <b>Cpd</b> | <b>Binding Energy (kcal/mol)</b> | <b>Interacting Amino Acids (non-van der Waals)</b>                                    |
|------------|----------------------------------|---------------------------------------------------------------------------------------|
| 1          | -9.5                             | Trp289, Tyr337                                                                        |
| 2          | -9.4                             | Trp86, Gly121, Tyr124, Glu202, Tyr341                                                 |
| 3          | -9.5                             | Asp74, Trp86, Tyr124, Trp286, Tyr337                                                  |
| 4          | -9.6                             | Trp86, Gly122, Ser203, Trp286, Phe297, Tyr337, Tyr341                                 |
| 5          | -9.0                             | Ser125, Trp286, Tyr337, Phe338                                                        |
| 6          | -9.4                             | Trp86, Tyr124, Trp286, Tyr337, Phe338                                                 |
| 7          | -5.9                             | Gly82, Trp86, Gly121, Trp286, Tyr337, Trp439, His447, Tyr449                          |
| 8          | -9.8                             | Trp86, Tyr124, Trp286, Ser293, Arg296, Tyr337, His447, Gly448                         |
| 9          | -9.6                             | Trp86, Gly122, Tyr124, Trp286, Val294, Phe295, Phe297, Tyr337, Phe338, Tyr341, His447 |
| 10         | -8.9                             | Gly121, Glu202, Trp286, Tyr337, Phe338                                                |
| 11         | -6.0                             | Trp86, Gly122, Glu202, Trp286, Tyr337, Tyr341, Trp439, Pro446, His447, Tyr449         |
| 12         | -9.2                             | Tyr72, Trp86, Asn87, Ser125, Tyr124, Gly126, Tyr337                                   |
| 13         | -7.0                             | Asp74, Tyr72, Trp86, Ser125, Tyr133, Trp286, Tyr341                                   |
| 14         | -9.7                             | Gln71, Asp74, Trp86, Tyr124, Trp286, Tyr337, Tyr341, His447                           |
| 15         | -7.8                             | Trp86, Gly122, Tyr124, Ser125, Glu202, Ser203, Trp286, Tyr341, His447                 |
| 16         | -9.5                             | Trp86, Tyr124, Trp286, Tyr337, His447, Gly448                                         |
| 17         | -9.4                             | Asp74, Trp86, Ser125, Trp286, Tyr337                                                  |
| 18         | -7.0                             | Gly121, Ser125, Tyr124, Trp286, Phe297, Tyr337, Tyr341, His447                        |

**Table S4.** Molecular docking scores and binding site interactions of *U. alba* metabolites **1–18** against USP14 (PDB:6IIM).

| <b>Cpd</b> | <b>Binding Energy (kcal/mol)</b> | <b>Interacting Amino Acids (non-van der Waals)</b>     |
|------------|----------------------------------|--------------------------------------------------------|
| <b>1</b>   | -8.3                             | Asp199, Arg330, Phe331, Lys342, His426, Tyr436         |
| <b>2</b>   | -8.4                             | Gln198, Phe331, Asn340, Lys342, Ser 431, Ser432        |
| <b>3</b>   | -8.0                             | Gln198, Arg330, Phe331, Asn340, Lys342, His426, Ser431 |
| <b>4</b>   | -7.7                             | Arg330, Phe331, Asn340, Lys342, His426, Ser431         |
| <b>5</b>   | -7.7                             | Arg330, Phe331, Lys342, His426, Ser431, Tyr436         |
| <b>6</b>   | -7.5                             | Arg330, Phe331, Lys342, Ser431                         |
| <b>7</b>   | -7.8                             | Phe331, Asn340, Lys342, Tyr476                         |
| <b>8</b>   | -8.4                             | Glu188, Gln198, Asn340, Lys342, Ser431, Tyr476         |
| <b>9</b>   | -8.0                             | Asp199, Arg330, Phe331, Lys342, His426, Ser431         |
| <b>10</b>  | -7.0                             | Asp199, Arg330, Phe331, Lys342, Tyr436                 |
| <b>11</b>  | -7.9                             | Asp199, Phe331, Asn340, Lys342                         |
| <b>12</b>  | -9.4                             | Gln197, Gln198, Phe331, Asn340, Lys342, Tyr476         |
| <b>13</b>  | -8.8                             | Asp199, Arg330, Phe331, Asn340, Lys342                 |
| <b>14</b>  | -8.0                             | Gln198, Asn340, Tyr436, Tyr476                         |
| <b>15</b>  | -9.0                             | Gln198, Asp199, Glu202, Phe331, Asn340, Lys342, Ser431 |
| <b>16</b>  | -9.8                             | Gln198, Asp199, Arg330, Lys342, Tyr476                 |
| <b>17</b>  | -7.9                             | Asp199, Arg330, Phe331, Asn340, Lys342, His426, Ser431 |
| <b>18</b>  | -7.4                             | Gln198, Lys342, Ser431, Tyr476                         |

**Table S5.** Molecular docking scores and binding site interactions of *U. alba* metabolites **1–18** against KEAP-1 Kelch domain (PDB:4L7B).

| <b>Cpd</b> | <b>Binding Energy (kcal/mol)</b> | <b>Interacting Amino Acids (non-van der Waals)</b>                             |
|------------|----------------------------------|--------------------------------------------------------------------------------|
| <b>1</b>   | -8.7                             | Tyr334, Arg415, Ala556                                                         |
| <b>2</b>   | -8.9                             | Tyr334, Ala556, Tyr572                                                         |
| <b>3</b>   | -8.7                             | Tyr334, Arg415, Arg483, Tyr525, Tyr572, Ser602                                 |
| <b>4</b>   | -7.9                             | Arg415, Arg483, Tyr525, Tyr572                                                 |
| <b>5</b>   | -8.1                             | Ser363, Tyr572, Ser602                                                         |
| <b>6</b>   | -8.3                             | Tyr334, Ser363, Tyr572                                                         |
| <b>7</b>   | -8.6                             | Asn387, Arg415, Ala556                                                         |
| <b>8</b>   | -10.1                            | Tyr334, Asn387, Ala556, Tyr572                                                 |
| <b>9</b>   | -9.3                             | Ser363, Arg415, Arg483, Tyr525, Tyr572, Ser602                                 |
| <b>10</b>  | -8.0                             | Tyr334, Arg415, Ile461, Ala556                                                 |
| <b>11</b>  | -8.8                             | Asn382, Asn387, Ala556, Tyr572                                                 |
| <b>12</b>  | -9.7                             | Arg415, Tyr525, Ala556, Tyr572                                                 |
| <b>13</b>  | -10.6                            | Tyr334, Asn382, Arg415, Tyr525, Ala556, Tyr572, Ser602                         |
| <b>14</b>  | -8.6                             | Ser383, Asn387, Arg415, Tyr525, Ala556, Tyr572                                 |
| <b>15</b>  | -10.2                            | Tyr334, Ser363, Arg380, Asn414, Arg415, Tyr525, Gln530, Ser555, Ala556, Tyr572 |
| <b>16</b>  | -11.1                            | Asn414, Arg415, Ile416, Gly462, Ala556, Tyr572, Gly603                         |
| <b>17</b>  | -8.6                             | Tyr334, Ser555, Tyr572, Ser602, Gly603                                         |
| <b>18</b>  | -8.9                             | Ser363, Asn414, Arg415, Ala556, Tyr572, Ser602                                 |

**Table S6.** Molecular docking scores and binding site interactions of *U. alba* metabolites **1–18** against KEAP1-1 BTB domain (PDB:5DAD).

| <b>Cpd</b> | <b>Binding Energy (kcal/mol)</b> | <b>Interacting Amino Acids (non-van der Waals)</b>           |
|------------|----------------------------------|--------------------------------------------------------------|
| <b>1</b>   | -6.8                             | His129, Lys131, Arg135, Cys151, His154                       |
| <b>2</b>   | -6.4                             | Ala88, His129, Pro130, Lys131, Arg135, Lys150, Cys151        |
| <b>3</b>   | -5.8                             | Tyr85, Lys131, Arg135, Lys150, Cys151                        |
| <b>4</b>   | -5.8                             | Tyr85, Lys131, Arg135, Cys151, His154                        |
| <b>5</b>   | -6.0                             | His129, Lys131, Lys150, Cys151                               |
| <b>6</b>   | -5.9                             | His129, Lys131, Arg135, Gly148, Cys151                       |
| <b>7</b>   | -7.1                             | Ala88, His129, Lys131, Arg135, Cys151, His154                |
| <b>8</b>   | -7.1                             | Tyr85, Ala88, His129, Lys131, Arg135, Gly148, Cys151, His154 |
| <b>9</b>   | -6.4                             | His129, Lys131, Arg135, Cys151                               |
| <b>10</b>  | -5.9                             | His129, Lys131, Arg135, Ser146, Cys151, His154               |
| <b>11</b>  | -6.9                             | Ala88, His129, Lys131, Arg135, Cys151                        |
| <b>12</b>  | -6.8                             | His129, Lys131, Arg135, Cys151                               |
| <b>13</b>  | -6.6                             | Tyr85, Ala88, His129, Lys131, Arg135, Cys151, His154         |
| <b>14</b>  | -6.8                             | Lys131, Arg135, Ser146, Gly148, Lys150, Cys151, His154       |
| <b>15</b>  | -7.3                             | Ala88, Pro89, His129, Pro130, Lys131, Cys151, His154         |
| <b>16</b>  | -6.7                             | Tyr85, Ala88, Pro89, His129, Lys131, Cys151                  |
| <b>17</b>  | -5.9                             | Gln86, Asp87, Ala88, Lys131, Arg135, Cys151                  |
| <b>18</b>  | -6.6                             | Ala88, Lys131, Val132, Cys151                                |

**Table S7.** Summary of energies of HOMO, LUMO, electronic chemical potential  $\mu$ , hardness  $\eta$  and global electrophilicity  $\omega$  of the electrophilic *U. alba* secondary metabolites.

| <b>Compound</b> | <b>HOMO<br/>(Ha)</b> | <b>LUMO<br/>(Ha)</b> | <b>hardness, <math>\eta</math><br/>(eV)</b> | <b>chemical<br/>potential, <math>\mu</math> (eV)</b> | <b>electrophilicity<br/>index, <math>\omega</math> (eV)</b> |
|-----------------|----------------------|----------------------|---------------------------------------------|------------------------------------------------------|-------------------------------------------------------------|
| <b>1</b>        | -0.315               | -0.049               | 7.244                                       | -4.960                                               | 1.698                                                       |
| <b>5</b>        | -0.326               | -0.044               | 7.673                                       | -5.021                                               | 1.643                                                       |
| <b>7</b>        | -0.291               | -0.052               | 6.491                                       | -4.661                                               | 1.674                                                       |
| <b>8</b>        | -0.271               | -0.045               | 6.140                                       | -4.302                                               | 1.507                                                       |
| <b>10</b>       | -0.280               | -0.040               | 6.541                                       | -4.347                                               | 1.444                                                       |
| <b>11</b>       | -0.291               | -0.052               | 6.516                                       | -4.670                                               | 1.673                                                       |
| <b>14</b>       | -0.271               | -0.054               | 5.901                                       | -4.412                                               | 1.650                                                       |
| <b>15</b>       | -0.367               | -0.037               | 8.965                                       | -5.499                                               | 1.686                                                       |
| <b>18</b>       | -0.293               | -0.047               | 6.689                                       | -4.618                                               | 1.594                                                       |

**Table S8.** Energetics of the reaction species calculated at the B3LYP/6-31G\*\* level of theory with the PCM water solvation model.

| Reaction species                                                                     | Energy, Ha   | Relative Energy <sup>a</sup> , kcal/mol |
|--------------------------------------------------------------------------------------|--------------|-----------------------------------------|
| reactants                                                                            | -3151.815138 | -                                       |
| TS1                                                                                  | -3151.766098 | 30.77                                   |
| enol intermediate                                                                    | -3151.770008 | 28.32                                   |
| TS2                                                                                  | -3151.766007 | 30.83                                   |
| keto product                                                                         | -3151.801912 | 8.30                                    |
| $\Delta E^\ddagger(E_{TS1}^\ddagger - E_{reactants}^\circ)$                          |              | 30.77                                   |
| $\Delta E_{keto-enol}^\ddagger(E_{keto\ prod}^\circ - E_{enol\ intermediate}^\circ)$ |              | -20.02                                  |
| $\Delta E_{reaction}^\circ(E_{keto\ prod}^\circ - E_{reactants}^\circ)$              |              | 8.30                                    |

<sup>a</sup>relative to the reactants (grandifloracin (**15**) + Cys151 tripeptide).

**Table S9.** Cartesian coordinates of the optimized structure of grandifloracin (**15**) calculated at B3LYP/6-31G\*\*(d,p).

| Center Number | Atomic Number | Atomic Type | Coordinates (Angstroms) |           |           |
|---------------|---------------|-------------|-------------------------|-----------|-----------|
|               |               |             | X                       | Y         | Z         |
| 1             | 8             | 0           | 5.244695                | -0.560319 | -0.672532 |
| 2             | 6             | 0           | 4.516187                | 0.211453  | -0.001913 |
| 3             | 8             | 0           | 3.368649                | -0.216528 | 0.746164  |
| 4             | 6             | 0           | 3.137949                | -1.668265 | 0.558406  |
| 5             | 6             | 0           | 1.844967                | -1.900512 | -0.320716 |
| 6             | 8             | 0           | 2.156732                | -1.236562 | -1.592468 |
| 7             | 6             | 0           | 0.538744                | -1.342651 | 0.417198  |
| 8             | 1             | 0           | 0.618168                | -0.252396 | 0.572137  |
| 9             | 6             | 0           | 0.392637                | -2.107766 | 1.740561  |
| 10            | 6             | 0           | 0.272331                | -3.438040 | 1.616277  |
| 11            | 6             | 0           | 0.248887                | -3.942631 | 0.166399  |
| 12            | 1             | 0           | 0.140766                | -5.038317 | 0.088457  |
| 13            | 6             | 0           | -0.954074               | -3.207065 | -0.589612 |
| 14            | 1             | 0           | -0.933845               | -3.530172 | -1.648667 |
| 15            | 6             | 0           | -0.707302               | -1.641674 | -0.510432 |
| 16            | 1             | 0           | -0.461095               | -1.281585 | -1.527219 |
| 17            | 6             | 0           | -1.978463               | -0.824434 | -0.054129 |
| 18            | 6             | 0           | -2.938513               | -0.548324 | -1.305625 |
| 19            | 8             | 0           | -2.392652               | 0.597855  | -2.045983 |
| 20            | 6             | 0           | -2.389886               | 1.808570  | -1.228050 |
| 21            | 6             | 0           | -3.735038               | 2.204498  | -0.547105 |
| 22            | 6             | 0           | -4.973424               | 1.988445  | -1.199180 |
| 23            | 6             | 0           | -6.171857               | 2.448760  | -0.619941 |
| 24            | 6             | 0           | -6.145404               | 3.131317  | 0.613090  |
| 25            | 6             | 0           | -4.914649               | 3.363127  | 1.261202  |
| 26            | 6             | 0           | -3.715265               | 2.908306  | 0.681051  |
| 27            | 8             | 0           | -1.441574               | 2.616093  | -1.379780 |
| 28            | 8             | 0           | -1.648620               | 0.476099  | 0.517376  |
| 29            | 6             | 0           | -2.789527               | -1.565781 | 1.077901  |
| 30            | 6             | 0           | -3.071962               | -3.016015 | 0.852832  |
| 31            | 6             | 0           | -2.261385               | -3.723888 | 0.036448  |
| 32            | 8             | 0           | -3.135733               | -0.827397 | 2.051724  |
| 33            | 6             | 0           | 1.603414                | -3.475581 | -0.512098 |
| 34            | 8             | 0           | 2.379677                | -4.231788 | -1.135048 |
| 35            | 6             | 0           | 4.717968                | 1.721611  | 0.167721  |
| 36            | 6             | 0           | 3.834676                | 2.514141  | 0.940203  |
| 37            | 6             | 0           | 4.059606                | 3.897783  | 1.068421  |
| 38            | 6             | 0           | 5.164337                | 4.497505  | 0.427936  |
| 39            | 6             | 0           | 6.047072                | 3.712325  | -0.343283 |
| 40            | 6             | 0           | 5.825015                | 2.329237  | -0.473319 |
| 41            | 1             | 0           | 3.006796                | -2.124105 | 1.560649  |

|    |   |   |           |           |           |
|----|---|---|-----------|-----------|-----------|
| 42 | 1 | 0 | 4.020206  | -2.105683 | 0.042419  |
| 43 | 1 | 0 | 1.362069  | -1.492312 | -2.188998 |
| 44 | 1 | 0 | 0.412189  | -1.573129 | 2.698933  |
| 45 | 1 | 0 | 0.174761  | -4.142507 | 2.452222  |
| 46 | 1 | 0 | -2.944046 | -1.407939 | -2.005185 |
| 47 | 1 | 0 | -3.974389 | -0.365293 | -0.949177 |
| 48 | 1 | 0 | -4.994878 | 1.469297  | -2.167399 |
| 49 | 1 | 0 | -7.127888 | 2.277181  | -1.133396 |
| 50 | 1 | 0 | -7.081161 | 3.487379  | 1.065165  |
| 51 | 1 | 0 | -4.890009 | 3.901803  | 2.218401  |
| 52 | 1 | 0 | -2.753558 | 3.096488  | 1.178496  |
| 53 | 1 | 0 | -2.262949 | 0.395580  | 1.373141  |
| 54 | 1 | 0 | -3.931605 | -3.476247 | 1.359719  |
| 55 | 1 | 0 | -2.468673 | -4.791031 | -0.147030 |
| 56 | 1 | 0 | 2.977688  | 2.036161  | 1.434098  |
| 57 | 1 | 0 | 3.373152  | 4.510943  | 1.668220  |
| 58 | 1 | 0 | 5.337328  | 5.577858  | 0.529795  |
| 59 | 1 | 0 | 6.907004  | 4.180107  | -0.841827 |
| 60 | 1 | 0 | 6.502334  | 1.701593  | -1.070052 |

---



**Table S10.** Cartesian coordinates of the optimized structure of Cys151 tripeptide (Lys150-Cys151-Val152) calculated at B3LYP/6-31G\*\*(d,p).

| Center Number | Atomic Number | Atomic Type | Coordinates (Angstroms) |           |           |
|---------------|---------------|-------------|-------------------------|-----------|-----------|
|               |               |             | X                       | Y         | Z         |
| 1             | 7             | 0           | 2.361111                | 0.868023  | 1.268858  |
| 2             | 1             | 0           | 1.737003                | 0.011434  | 1.240928  |
| 3             | 6             | 0           | 1.373003                | 2.012693  | 0.967453  |
| 4             | 1             | 0           | 1.587561                | 2.852129  | 1.664499  |
| 5             | 6             | 0           | 1.481889                | 2.578131  | -0.494324 |
| 6             | 6             | 0           | -0.110017               | 1.476856  | 1.280106  |
| 7             | 1             | 0           | 2.561425                | 2.755486  | -0.676392 |
| 8             | 1             | 0           | 1.138045                | 1.810312  | -1.210880 |
| 9             | 16            | 0           | 0.498532                | 4.121111  | -0.668202 |
| 10            | 8             | 0           | -0.964151               | 2.188826  | 1.889927  |
| 11            | 1             | 0           | 0.966725                | 4.395032  | -1.917097 |
| 12            | 6             | 0           | 3.488541                | 0.650127  | 0.349012  |
| 13            | 6             | 0           | 3.408449                | -0.408497 | -0.833282 |
| 14            | 8             | 0           | 4.193782                | 1.805101  | -0.033247 |
| 15            | 7             | 0           | 4.243083                | 0.252130  | -1.943675 |
| 16            | 1             | 0           | 2.366796                | -0.550971 | -1.190697 |
| 17            | 6             | 0           | 4.024614                | -1.808205 | -0.466955 |
| 18            | 1             | 0           | 4.505670                | 1.436889  | -0.989412 |
| 19            | 1             | 0           | 3.639216                | 0.376324  | -2.797153 |
| 20            | 1             | 0           | 5.007006                | -0.409770 | -2.240196 |
| 21            | 1             | 0           | 4.171270                | -2.390032 | -1.395565 |
| 22            | 1             | 0           | 5.020708                | -1.636629 | -0.022100 |
| 23            | 6             | 0           | 3.156981                | -2.660345 | 0.525147  |
| 24            | 1             | 0           | 2.821307                | -1.999071 | 1.346536  |
| 25            | 6             | 0           | 1.901718                | -3.275338 | -0.173120 |
| 26            | 6             | 0           | 4.037653                | -3.789658 | 1.153005  |
| 27            | 1             | 0           | 2.217448                | -3.894580 | -1.026893 |
| 28            | 1             | 0           | 1.372945                | -3.929197 | 0.537642  |
| 29            | 1             | 0           | 1.182262                | -2.498787 | -0.531573 |
| 30            | 1             | 0           | 4.900566                | -3.361607 | 1.686274  |
| 31            | 1             | 0           | 3.448373                | -4.384774 | 1.867600  |
| 32            | 1             | 0           | 4.415254                | -4.465893 | 0.370454  |
| 33            | 7             | 0           | -0.219205               | 0.138613  | 0.856504  |
| 34            | 1             | 0           | 0.171125                | -0.430239 | -0.182460 |
| 35            | 6             | 0           | -1.541478               | -0.558172 | 0.840606  |
| 36            | 1             | 0           | -1.705644               | -1.168579 | 1.757350  |
| 37            | 6             | 0           | -2.830058               | 0.308245  | 0.601532  |
| 38            | 6             | 0           | -1.321360               | -1.552562 | -0.441379 |
| 39            | 1             | 0           | -2.940336               | 1.051941  | 1.410747  |
| 40            | 1             | 0           | -2.721936               | 0.866197  | -0.345051 |

|    |   |   |           |           |           |
|----|---|---|-----------|-----------|-----------|
| 41 | 6 | 0 | -4.060390 | -0.648410 | 0.502666  |
| 42 | 8 | 0 | -0.102481 | -1.308460 | -0.995929 |
| 43 | 1 | 0 | -3.723491 | -1.504280 | -0.131133 |
| 44 | 1 | 0 | -4.310238 | -1.035441 | 1.505373  |
| 45 | 6 | 0 | -5.313463 | 0.056059  | -0.101917 |
| 46 | 1 | 0 | -5.609977 | 0.917421  | 0.523115  |
| 47 | 1 | 0 | -5.085792 | 0.427549  | -1.116564 |
| 48 | 6 | 0 | -6.501267 | -0.941430 | -0.182070 |
| 49 | 1 | 0 | -6.292034 | -1.798266 | -0.850783 |
| 50 | 1 | 0 | -6.815024 | -1.307570 | 0.814162  |
| 51 | 7 | 0 | -7.758089 | -0.245486 | -0.781319 |
| 52 | 1 | 0 | -7.567872 | 0.117243  | -1.758970 |
| 53 | 1 | 0 | -8.578494 | -0.913805 | -0.842461 |
| 54 | 1 | 0 | -8.061179 | 0.579655  | -0.189229 |
| 55 | 8 | 0 | -2.311073 | -2.475349 | -0.903797 |
| 56 | 1 | 0 | -1.881010 | -3.266765 | -1.235923 |

---

**Table S11.** Cartesian coordinates of the optimized structure of TS1 calculated at B3LYP/6-31G\*\*(d,p).

| Center Number | Atomic Number | Atomic Type | Coordinates (Angstroms) |           |           |
|---------------|---------------|-------------|-------------------------|-----------|-----------|
|               |               |             | X                       | Y         | Z         |
| 1             | 8             | 0           | -2.754592               | -2.534959 | -1.339143 |
| 2             | 6             | 0           | -3.777586               | -3.195930 | -0.990625 |
| 3             | 8             | 0           | -3.807572               | -4.047511 | 0.147586  |
| 4             | 6             | 0           | -2.505565               | -4.049816 | 0.863247  |
| 5             | 6             | 0           | -2.530788               | -3.143255 | 2.157265  |
| 6             | 8             | 0           | -3.488387               | -3.807580 | 3.054150  |
| 7             | 6             | 0           | -2.893815               | -1.600293 | 1.915125  |
| 8             | 1             | 0           | -3.853575               | -1.507533 | 1.376184  |
| 9             | 6             | 0           | -2.954738               | -0.984524 | 3.328238  |
| 10            | 6             | 0           | -1.819942               | -1.084302 | 4.041631  |
| 11            | 6             | 0           | -0.623768               | -1.689190 | 3.278792  |
| 12            | 1             | 0           | 0.300252                | -1.728426 | 3.881550  |
| 13            | 6             | 0           | -0.460636               | -0.755464 | 2.010110  |
| 14            | 6             | 0           | -1.698551               | -0.994779 | 1.079921  |
| 15            | 1             | 0           | -1.414756               | -1.770959 | 0.349024  |
| 16            | 6             | 0           | -1.967519               | 0.281788  | 0.174730  |
| 17            | 6             | 0           | -2.531830               | 1.504851  | 1.026712  |
| 18            | 8             | 0           | -2.133654               | 2.822634  | 0.484042  |
| 19            | 6             | 0           | -3.010314               | 3.417805  | -0.472574 |
| 20            | 6             | 0           | -4.457160               | 2.888805  | -0.663407 |
| 21            | 6             | 0           | -4.854290               | 2.386268  | -1.925634 |
| 22            | 6             | 0           | -6.191084               | 2.001445  | -2.146001 |
| 23            | 6             | 0           | -7.143015               | 2.126228  | -1.113590 |
| 24            | 6             | 0           | -6.756559               | 2.640383  | 0.140568  |
| 25            | 6             | 0           | -5.419872               | 3.022598  | 0.367072  |
| 26            | 8             | 0           | -2.574293               | 4.428423  | -1.083258 |
| 27            | 8             | 0           | -2.979014               | 0.040833  | -0.854563 |
| 28            | 6             | 0           | -0.558246               | 0.598645  | -0.469726 |
| 29            | 8             | 0           | -0.663382               | 1.521372  | -1.542284 |
| 30            | 6             | 0           | 0.600393                | -0.012971 | -0.127625 |
| 31            | 6             | 0           | 0.820316                | -0.880631 | 1.122195  |
| 32            | 16            | 0           | 2.318219                | -0.306759 | 2.068699  |
| 33            | 6             | 0           | 3.635472                | -0.944662 | 0.953041  |
| 34            | 6             | 0           | 4.332096                | 0.128926  | 0.016646  |
| 35            | 1             | 0           | 4.824092                | 0.956547  | 0.605060  |
| 36            | 7             | 0           | 3.373039                | 0.790905  | -0.934595 |
| 37            | 6             | 0           | 3.034325                | 2.198708  | -0.842005 |
| 38            | 6             | 0           | 3.321977                | 2.868365  | 0.572536  |
| 39            | 1             | 0           | 2.797135                | 2.248784  | 1.333903  |
| 40            | 6             | 0           | 2.795753                | 4.345990  | 0.605286  |
| 41            | 6             | 0           | 1.239943                | 4.448147  | 0.641090  |

|    |   |   |           |           |           |
|----|---|---|-----------|-----------|-----------|
| 42 | 6 | 0 | 0.758723  | 5.932683  | 0.605725  |
| 43 | 6 | 0 | -0.786093 | 6.056761  | 0.787525  |
| 44 | 7 | 0 | -1.209326 | 7.515252  | 0.631697  |
| 45 | 7 | 0 | 4.813114  | 2.754981  | 0.892401  |
| 46 | 8 | 0 | 2.412153  | 2.769380  | -1.776348 |
| 47 | 6 | 0 | 5.359207  | -0.575740 | -0.947995 |
| 48 | 7 | 0 | 6.464159  | -1.295785 | -0.293804 |
| 49 | 6 | 0 | 7.640780  | -1.652316 | -1.187820 |
| 50 | 1 | 0 | 7.285220  | -1.487295 | -2.227583 |
| 51 | 6 | 0 | 8.935688  | -0.804253 | -0.914797 |
| 52 | 6 | 0 | 10.067214 | -1.292835 | -1.873737 |
| 53 | 6 | 0 | 8.671223  | 0.725312  | -1.081280 |
| 54 | 6 | 0 | 7.869004  | -3.235424 | -0.960635 |
| 55 | 8 | 0 | 6.848675  | -3.778613 | -0.179005 |
| 56 | 8 | 0 | 8.823991  | -3.908979 | -1.421098 |
| 57 | 8 | 0 | 5.188079  | -0.591777 | -2.192832 |
| 58 | 6 | 0 | -1.052371 | -3.141641 | 2.811784  |
| 59 | 8 | 0 | -0.363996 | -4.172065 | 2.975784  |
| 60 | 6 | 0 | -5.122520 | -3.214339 | -1.713292 |
| 61 | 6 | 0 | -5.257824 | -2.471243 | -2.911959 |
| 62 | 6 | 0 | -6.482228 | -2.467237 | -3.604498 |
| 63 | 6 | 0 | -7.576828 | -3.203938 | -3.104113 |
| 64 | 6 | 0 | -7.446602 | -3.945660 | -1.910584 |
| 65 | 6 | 0 | -6.223746 | -3.953369 | -1.214446 |
| 66 | 1 | 0 | -1.700470 | -3.738443 | 0.167456  |
| 67 | 1 | 0 | -2.333095 | -5.097221 | 1.186385  |
| 68 | 1 | 0 | -3.537576 | -3.136854 | 3.831693  |
| 69 | 1 | 0 | -3.883669 | -0.537221 | 3.705158  |
| 70 | 1 | 0 | -1.697278 | -0.725772 | 5.072392  |
| 71 | 1 | 0 | -0.487352 | 0.281700  | 2.390133  |
| 72 | 1 | 0 | -3.632826 | 1.398208  | 1.090001  |
| 73 | 1 | 0 | -2.108958 | 1.482351  | 2.051053  |
| 74 | 1 | 0 | -4.113923 | 2.295058  | -2.732386 |
| 75 | 1 | 0 | -6.491167 | 1.606984  | -3.126433 |
| 76 | 1 | 0 | -8.185816 | 1.827760  | -1.287843 |
| 77 | 1 | 0 | -7.497822 | 2.746859  | 0.944421  |
| 78 | 1 | 0 | -5.125583 | 3.433057  | 1.343065  |
| 79 | 1 | 0 | -2.771558 | -0.925415 | -1.178944 |
| 80 | 1 | 0 | 1.525544  | 0.209592  | -0.682951 |
| 81 | 1 | 0 | 0.980344  | -1.943718 | 0.842647  |
| 82 | 1 | 0 | 3.226218  | -1.759134 | 0.330197  |
| 83 | 1 | 0 | 4.428021  | -1.382303 | 1.586609  |
| 84 | 1 | 0 | 3.614294  | 0.455803  | -1.912808 |
| 85 | 1 | 0 | 3.179756  | 4.878169  | -0.282726 |
| 86 | 1 | 0 | 3.212484  | 4.843496  | 1.499588  |
| 87 | 1 | 0 | 0.864411  | 3.958816  | 1.556677  |

|     |   |   |           |           |           |
|-----|---|---|-----------|-----------|-----------|
| 88  | 1 | 0 | 0.823005  | 3.905733  | -0.224471 |
| 89  | 1 | 0 | 1.265130  | 6.500967  | 1.406594  |
| 90  | 1 | 0 | 1.049977  | 6.389656  | -0.355838 |
| 91  | 1 | 0 | -1.063930 | 5.636728  | 1.778293  |
| 92  | 1 | 0 | -1.319019 | 5.461721  | 0.011274  |
| 93  | 1 | 0 | -0.812867 | 7.997294  | 1.492229  |
| 94  | 1 | 0 | -2.247520 | 7.507429  | 0.859114  |
| 95  | 1 | 0 | 4.931818  | 3.228203  | 1.833153  |
| 96  | 1 | 0 | 5.303810  | 3.420033  | 0.229337  |
| 97  | 1 | 0 | 6.761664  | -0.819655 | 0.596456  |
| 98  | 1 | 0 | 9.250253  | -0.996906 | 0.129418  |
| 99  | 1 | 0 | 9.864004  | -0.961297 | -2.903140 |
| 100 | 1 | 0 | 10.090045 | -2.396984 | -1.852524 |
| 101 | 1 | 0 | 11.039177 | -0.886559 | -1.557571 |
| 102 | 1 | 0 | 8.335029  | 0.948953  | -2.105354 |
| 103 | 1 | 0 | 9.598932  | 1.285553  | -0.889713 |
| 104 | 1 | 0 | 7.904335  | 1.079398  | -0.375768 |
| 105 | 1 | 0 | 6.314016  | -2.887578 | 0.007855  |
| 106 | 1 | 0 | -4.394661 | -1.904063 | -3.288678 |
| 107 | 1 | 0 | -6.585121 | -1.891306 | -4.534288 |
| 108 | 1 | 0 | -8.533333 | -3.200386 | -3.645327 |
| 109 | 1 | 0 | -8.300587 | -4.518131 | -1.523406 |
| 110 | 1 | 0 | -6.109394 | -4.526515 | -0.284051 |
| 111 | 1 | 0 | 0.318665  | 1.686839  | -1.805817 |

---

**Table S12.** Cartesian coordinates of the optimized structure of grandifloracin (**15**)-Cys151 enol adduct (**20**) calculated at B3LYP/6-31G\*\*(d,p).

| Center Number | Atomic Number | Atomic Type | Coordinates (Angstroms) |           |           |
|---------------|---------------|-------------|-------------------------|-----------|-----------|
|               |               |             | X                       | Y         | Z         |
| 1             | 8             | 0           | -2.754592               | -2.534959 | -1.339143 |
| 2             | 6             | 0           | -3.777586               | -3.195930 | -0.990625 |
| 3             | 8             | 0           | -3.807572               | -4.047511 | 0.147586  |
| 4             | 6             | 0           | -2.505565               | -4.049816 | 0.863247  |
| 5             | 6             | 0           | -2.530788               | -3.143255 | 2.157265  |
| 6             | 8             | 0           | -3.488387               | -3.807580 | 3.054150  |
| 7             | 6             | 0           | -2.893815               | -1.600293 | 1.915125  |
| 8             | 1             | 0           | -3.853575               | -1.507533 | 1.376184  |
| 9             | 6             | 0           | -2.954738               | -0.984524 | 3.328238  |
| 10            | 6             | 0           | -1.819942               | -1.084302 | 4.041631  |
| 11            | 6             | 0           | -0.623768               | -1.689190 | 3.278792  |
| 12            | 1             | 0           | 0.300252                | -1.728426 | 3.881550  |
| 13            | 6             | 0           | -0.460636               | -0.755464 | 2.010110  |
| 14            | 6             | 0           | -1.698551               | -0.994779 | 1.079921  |
| 15            | 1             | 0           | -1.414756               | -1.770959 | 0.349024  |
| 16            | 6             | 0           | -1.967519               | 0.281788  | 0.174730  |
| 17            | 6             | 0           | -2.531830               | 1.504851  | 1.026712  |
| 18            | 8             | 0           | -2.133654               | 2.822634  | 0.484042  |
| 19            | 6             | 0           | -3.010314               | 3.417805  | -0.472574 |
| 20            | 6             | 0           | -4.457160               | 2.888805  | -0.663407 |
| 21            | 6             | 0           | -4.854290               | 2.386268  | -1.925634 |
| 22            | 6             | 0           | -6.191084               | 2.001445  | -2.146001 |
| 23            | 6             | 0           | -7.143015               | 2.126228  | -1.113590 |
| 24            | 6             | 0           | -6.756559               | 2.640383  | 0.140568  |
| 25            | 6             | 0           | -5.419872               | 3.022598  | 0.367072  |
| 26            | 8             | 0           | -2.574293               | 4.428423  | -1.083258 |
| 27            | 8             | 0           | -2.979014               | 0.040833  | -0.854563 |
| 28            | 6             | 0           | -0.558246               | 0.598645  | -0.469726 |
| 29            | 8             | 0           | -0.663382               | 1.521372  | -1.542284 |
| 30            | 6             | 0           | 0.600393                | -0.012971 | -0.127625 |
| 31            | 6             | 0           | 0.820316                | -0.880631 | 1.122195  |
| 32            | 16            | 0           | 2.318219                | -0.306759 | 2.068699  |
| 33            | 6             | 0           | 3.635472                | -0.944662 | 0.953041  |
| 34            | 6             | 0           | 4.332096                | 0.128926  | 0.016646  |
| 35            | 1             | 0           | 4.824092                | 0.956547  | 0.605060  |
| 36            | 7             | 0           | 3.373039                | 0.790905  | -0.934595 |
| 37            | 6             | 0           | 3.034325                | 2.198708  | -0.842005 |
| 38            | 6             | 0           | 3.321977                | 2.868365  | 0.572536  |
| 39            | 1             | 0           | 2.797135                | 2.248784  | 1.333903  |
| 40            | 6             | 0           | 2.795753                | 4.345990  | 0.605286  |
| 41            | 6             | 0           | 1.239943                | 4.448147  | 0.641090  |

|    |   |   |           |           |           |
|----|---|---|-----------|-----------|-----------|
| 42 | 6 | 0 | 0.758723  | 5.932683  | 0.605725  |
| 43 | 6 | 0 | -0.786093 | 6.056761  | 0.787525  |
| 44 | 7 | 0 | -1.209326 | 7.515252  | 0.631697  |
| 45 | 7 | 0 | 4.813114  | 2.754981  | 0.892401  |
| 46 | 8 | 0 | 2.412153  | 2.769380  | -1.776348 |
| 47 | 6 | 0 | 5.359207  | -0.575740 | -0.947995 |
| 48 | 7 | 0 | 6.464159  | -1.295785 | -0.293804 |
| 49 | 6 | 0 | 7.640780  | -1.652316 | -1.187820 |
| 50 | 1 | 0 | 7.285220  | -1.487295 | -2.227583 |
| 51 | 6 | 0 | 8.935688  | -0.804253 | -0.914797 |
| 52 | 6 | 0 | 10.067214 | -1.292835 | -1.873737 |
| 53 | 6 | 0 | 8.671223  | 0.725312  | -1.081280 |
| 54 | 6 | 0 | 7.869004  | -3.235424 | -0.960635 |
| 55 | 8 | 0 | 6.848675  | -3.778613 | -0.179005 |
| 56 | 8 | 0 | 8.823991  | -3.908979 | -1.421098 |
| 57 | 8 | 0 | 5.188079  | -0.591777 | -2.192832 |
| 58 | 6 | 0 | -1.052371 | -3.141641 | 2.811784  |
| 59 | 8 | 0 | -0.363996 | -4.172065 | 2.975784  |
| 60 | 6 | 0 | -5.122520 | -3.214339 | -1.713292 |
| 61 | 6 | 0 | -5.257824 | -2.471243 | -2.911959 |
| 62 | 6 | 0 | -6.482228 | -2.467237 | -3.604498 |
| 63 | 6 | 0 | -7.576828 | -3.203938 | -3.104113 |
| 64 | 6 | 0 | -7.446602 | -3.945660 | -1.910584 |
| 65 | 6 | 0 | -6.223746 | -3.953369 | -1.214446 |
| 66 | 1 | 0 | -1.700470 | -3.738443 | 0.167456  |
| 67 | 1 | 0 | -2.333095 | -5.097221 | 1.186385  |
| 68 | 1 | 0 | -3.537576 | -3.136854 | 3.831693  |
| 69 | 1 | 0 | -3.883669 | -0.537221 | 3.705158  |
| 70 | 1 | 0 | -1.697278 | -0.725772 | 5.072392  |
| 71 | 1 | 0 | -0.487352 | 0.281700  | 2.390133  |
| 72 | 1 | 0 | -3.632826 | 1.398208  | 1.090001  |
| 73 | 1 | 0 | -2.108958 | 1.482351  | 2.051053  |
| 74 | 1 | 0 | -4.113923 | 2.295058  | -2.732386 |
| 75 | 1 | 0 | -6.491167 | 1.606984  | -3.126433 |
| 76 | 1 | 0 | -8.185816 | 1.827760  | -1.287843 |
| 77 | 1 | 0 | -7.497822 | 2.746859  | 0.944421  |
| 78 | 1 | 0 | -5.125583 | 3.433057  | 1.343065  |
| 79 | 1 | 0 | -2.771558 | -0.925415 | -1.178944 |
| 80 | 1 | 0 | 1.525544  | 0.209592  | -0.682951 |
| 81 | 1 | 0 | 0.980344  | -1.943718 | 0.842647  |
| 82 | 1 | 0 | 3.226218  | -1.759134 | 0.330197  |
| 83 | 1 | 0 | 4.428021  | -1.382303 | 1.586609  |
| 84 | 1 | 0 | 3.614294  | 0.455803  | -1.912808 |
| 85 | 1 | 0 | 3.179756  | 4.878169  | -0.282726 |
| 86 | 1 | 0 | 3.212484  | 4.843496  | 1.499588  |
| 87 | 1 | 0 | 0.864411  | 3.958816  | 1.556677  |

|     |   |   |           |           |           |
|-----|---|---|-----------|-----------|-----------|
| 88  | 1 | 0 | 0.823005  | 3.905733  | -0.224471 |
| 89  | 1 | 0 | 1.265130  | 6.500967  | 1.406594  |
| 90  | 1 | 0 | 1.049977  | 6.389656  | -0.355838 |
| 91  | 1 | 0 | -1.063930 | 5.636728  | 1.778293  |
| 92  | 1 | 0 | -1.319019 | 5.461721  | 0.011274  |
| 93  | 1 | 0 | -0.812867 | 7.997294  | 1.492229  |
| 94  | 1 | 0 | -2.247520 | 7.507429  | 0.859114  |
| 95  | 1 | 0 | 4.931818  | 3.228203  | 1.833153  |
| 96  | 1 | 0 | 5.303810  | 3.420033  | 0.229337  |
| 97  | 1 | 0 | 6.761664  | -0.819655 | 0.596456  |
| 98  | 1 | 0 | 9.250253  | -0.996906 | 0.129418  |
| 99  | 1 | 0 | 9.864004  | -0.961297 | -2.903140 |
| 100 | 1 | 0 | 10.090045 | -2.396984 | -1.852524 |
| 101 | 1 | 0 | 11.039177 | -0.886559 | -1.557571 |
| 102 | 1 | 0 | 8.335029  | 0.948953  | -2.105354 |
| 103 | 1 | 0 | 9.598932  | 1.285553  | -0.889713 |
| 104 | 1 | 0 | 7.904335  | 1.079398  | -0.375768 |
| 105 | 1 | 0 | 6.314016  | -2.887578 | 0.007855  |
| 106 | 1 | 0 | -4.394661 | -1.904063 | -3.288678 |
| 107 | 1 | 0 | -6.585121 | -1.891306 | -4.534288 |
| 108 | 1 | 0 | -8.533333 | -3.200386 | -3.645327 |
| 109 | 1 | 0 | -8.300587 | -4.518131 | -1.523406 |
| 110 | 1 | 0 | -6.109394 | -4.526515 | -0.284051 |
| 111 | 1 | 0 | 0.318665  | 1.686839  | -1.805817 |

---



**Table S13.** Cartesian coordinates of the optimized structure of TS2 calculated at B3LYP/6-31G\*\*(d,p).

| Center Number | Atomic Number | Atomic Type | Coordinates (Angstroms) |           |           |
|---------------|---------------|-------------|-------------------------|-----------|-----------|
|               |               |             | X                       | Y         | Z         |
| 1             | 8             | 0           | -2.698756               | -3.444787 | -1.116319 |
| 2             | 6             | 0           | -3.675015               | -4.035815 | -0.566334 |
| 3             | 8             | 0           | -3.682644               | -4.423316 | 0.801051  |
| 4             | 6             | 0           | -2.427132               | -4.026888 | 1.491220  |
| 5             | 6             | 0           | -2.606478               | -2.702545 | 2.334163  |
| 6             | 8             | 0           | -3.573585               | -3.062406 | 3.381926  |
| 7             | 6             | 0           | -3.063359               | -1.413972 | 1.496674  |
| 8             | 1             | 0           | -3.976930               | -1.629914 | 0.914733  |
| 9             | 6             | 0           | -3.295746               | -0.320440 | 2.559234  |
| 10            | 6             | 0           | -2.224018               | -0.025145 | 3.315022  |
| 11            | 6             | 0           | -0.921786               | -0.738511 | 2.899565  |
| 12            | 1             | 0           | -0.052065               | -0.450214 | 3.515313  |
| 13            | 6             | 0           | -0.730811               | -0.334454 | 1.380913  |
| 14            | 6             | 0           | -1.845554               | -1.055833 | 0.556749  |
| 15            | 1             | 0           | -1.439858               | -2.017538 | 0.198658  |
| 16            | 6             | 0           | -2.125166               | -0.240879 | -0.767423 |
| 17            | 6             | 0           | -2.784395               | 1.182314  | -0.522636 |
| 18            | 8             | 0           | -1.769558               | 2.082490  | 0.082912  |
| 19            | 6             | 0           | -2.262725               | 3.365728  | 0.490429  |
| 20            | 6             | 0           | -3.736333               | 3.742073  | 0.183292  |
| 21            | 6             | 0           | -4.122185               | 4.140350  | -1.119477 |
| 22            | 6             | 0           | -5.445693               | 4.552606  | -1.368444 |
| 23            | 6             | 0           | -6.390745               | 4.570654  | -0.322403 |
| 24            | 6             | 0           | -6.008789               | 4.181862  | 0.977444  |
| 25            | 6             | 0           | -4.684925               | 3.773638  | 1.233090  |
| 26            | 8             | 0           | -1.451442               | 4.123053  | 1.078717  |
| 27            | 8             | 0           | -3.071369               | -0.902388 | -1.665722 |
| 28            | 6             | 0           | -0.701252               | -0.062585 | -1.434115 |
| 29            | 8             | 0           | -0.838287               | 0.313367  | -2.792432 |
| 30            | 6             | 0           | 0.484409                | -0.282200 | -0.814676 |
| 31            | 6             | 0           | 0.641389                | -0.611450 | 0.684442  |
| 32            | 16            | 0           | 1.943537                | 0.430073  | 1.499787  |
| 33            | 6             | 0           | 3.456939                | -0.418023 | 0.880595  |
| 34            | 6             | 0           | 4.277440                | 0.445585  | -0.147763 |
| 35            | 1             | 0           | 4.444571                | 1.486170  | 0.257703  |
| 36            | 7             | 0           | 3.508828                | 0.665627  | -1.439863 |
| 37            | 6             | 0           | 3.214409                | 2.023373  | -1.881077 |
| 38            | 6             | 0           | 2.858253                | 3.002553  | -0.683588 |
| 39            | 1             | 0           | 2.200997                | 2.425647  | 0.006999  |
| 40            | 6             | 0           | 2.117667                | 4.277844  | -1.218938 |
| 41            | 6             | 0           | 1.355165                | 5.049386  | -0.097807 |

|    |   |   |           |           |           |
|----|---|---|-----------|-----------|-----------|
| 42 | 6 | 0 | 0.657328  | 6.335878  | -0.640469 |
| 43 | 6 | 0 | -0.243212 | 6.992210  | 0.452214  |
| 44 | 7 | 0 | -1.026831 | 8.160587  | -0.137486 |
| 45 | 7 | 0 | 4.132437  | 3.285381  | 0.110352  |
| 46 | 8 | 0 | 3.114513  | 2.309108  | -3.099190 |
| 47 | 6 | 0 | 5.698375  | -0.138154 | -0.530643 |
| 48 | 7 | 0 | 5.919843  | -1.576350 | -0.203169 |
| 49 | 6 | 0 | 7.358258  | -2.045904 | -0.336447 |
| 50 | 1 | 0 | 7.881982  | -1.227849 | -0.877536 |
| 51 | 6 | 0 | 8.078797  | -2.345621 | 1.027681  |
| 52 | 6 | 0 | 9.524786  | -2.854817 | 0.729201  |
| 53 | 6 | 0 | 8.101463  | -1.093782 | 1.960439  |
| 54 | 6 | 0 | 7.272859  | -3.342166 | -1.297742 |
| 55 | 8 | 0 | 5.980266  | -3.503606 | -1.793214 |
| 56 | 8 | 0 | 8.227772  | -4.109944 | -1.577244 |
| 57 | 8 | 0 | 6.556509  | 0.497502  | -1.184105 |
| 58 | 6 | 0 | -1.186357 | -2.299692 | 2.995505  |
| 59 | 8 | 0 | -0.425153 | -3.116121 | 3.558086  |
| 60 | 6 | 0 | -4.976281 | -4.446563 | -1.251497 |
| 61 | 6 | 0 | -5.120014 | -4.197051 | -2.638820 |
| 62 | 6 | 0 | -6.305147 | -4.564167 | -3.301716 |
| 63 | 6 | 0 | -7.351621 | -5.181317 | -2.583834 |
| 64 | 6 | 0 | -7.212793 | -5.431761 | -1.201912 |
| 65 | 6 | 0 | -6.029223 | -5.066616 | -0.534248 |
| 66 | 1 | 0 | -1.610444 | -3.927174 | 0.748252  |
| 67 | 1 | 0 | -2.191171 | -4.851362 | 2.195150  |
| 68 | 1 | 0 | -3.727307 | -2.152798 | 3.835593  |
| 69 | 1 | 0 | -4.287658 | 0.131086  | 2.690790  |
| 70 | 1 | 0 | -2.221496 | 0.704205  | 4.136122  |
| 71 | 1 | 0 | -0.916391 | 0.755016  | 1.302539  |
| 72 | 1 | 0 | -3.120702 | 1.576316  | -1.505445 |
| 73 | 1 | 0 | -3.670235 | 1.078771  | 0.138889  |
| 74 | 1 | 0 | -3.387401 | 4.133229  | -1.936568 |
| 75 | 1 | 0 | -5.739237 | 4.861453  | -2.381119 |
| 76 | 1 | 0 | -7.422983 | 4.890850  | -0.519666 |
| 77 | 1 | 0 | -6.742115 | 4.198900  | 1.795350  |
| 78 | 1 | 0 | -4.387413 | 3.476551  | 2.248400  |
| 79 | 1 | 0 | -2.834618 | -1.910846 | -1.563564 |
| 80 | 1 | 0 | 1.429853  | -0.145355 | -1.364041 |
| 81 | 1 | 0 | 0.923992  | -1.677569 | 0.817926  |
| 82 | 1 | 0 | 3.184333  | -1.390461 | 0.436727  |
| 83 | 1 | 0 | 4.106475  | -0.612942 | 1.753803  |
| 84 | 1 | 0 | 3.852449  | 0.074771  | -2.239516 |
| 85 | 1 | 0 | 1.401303  | 3.961949  | -1.997008 |
| 86 | 1 | 0 | 2.853074  | 4.944093  | -1.704836 |
| 87 | 1 | 0 | 2.055443  | 5.330512  | 0.708707  |

|     |   |   |           |           |           |
|-----|---|---|-----------|-----------|-----------|
| 88  | 1 | 0 | 0.580378  | 4.394474  | 0.344765  |
| 89  | 1 | 0 | 1.416000  | 7.059936  | -0.986815 |
| 90  | 1 | 0 | 0.028192  | 6.074027  | -1.508708 |
| 91  | 1 | 0 | 0.388131  | 7.289379  | 1.317313  |
| 92  | 1 | 0 | -0.969427 | 6.234307  | 0.810344  |
| 93  | 1 | 0 | -0.286477 | 8.897433  | -0.334286 |
| 94  | 1 | 0 | -1.524422 | 8.585735  | 0.699981  |
| 95  | 1 | 0 | 3.836878  | 3.925489  | 0.901197  |
| 96  | 1 | 0 | 4.723243  | 3.918735  | -0.500301 |
| 97  | 1 | 0 | 5.499010  | -1.841117 | 0.723028  |
| 98  | 1 | 0 | 7.518303  | -3.154581 | 1.535630  |
| 99  | 1 | 0 | 10.158347 | -2.023166 | 0.385877  |
| 100 | 1 | 0 | 9.468227  | -3.613738 | -0.071694 |
| 101 | 1 | 0 | 9.973315  | -3.289386 | 1.634604  |
| 102 | 1 | 0 | 8.630717  | -0.260385 | 1.473579  |
| 103 | 1 | 0 | 8.624611  | -1.337757 | 2.897504  |
| 104 | 1 | 0 | 7.083436  | -0.761160 | 2.213257  |
| 105 | 1 | 0 | 5.529271  | -2.690692 | -1.282759 |
| 106 | 1 | 0 | -4.294426 | -3.717048 | -3.183562 |
| 107 | 1 | 0 | -6.414887 | -4.370633 | -4.377508 |
| 108 | 1 | 0 | -8.277308 | -5.467944 | -3.102296 |
| 109 | 1 | 0 | -8.029346 | -5.912152 | -0.645677 |
| 110 | 1 | 0 | -5.908479 | -5.255647 | 0.541317  |
| 111 | 1 | 0 | 0.132906  | 0.390690  | -3.113500 |

---

**Table S14.** Cartesian coordinates of the optimized structure of grandifloracin (**15**)-Cys151 keto adduct (**21**) calculated at B3LYP/6-31G\*\*(d,p).

| Center Number | Atomic Number | Atomic Type | Coordinates (Angstroms) |           |           |
|---------------|---------------|-------------|-------------------------|-----------|-----------|
|               |               |             | X                       | Y         | Z         |
| 1             | 8             | 0           | -1.355818               | 4.827134  | -1.451461 |
| 2             | 6             | 0           | -1.902443               | 3.873882  | -0.843009 |
| 3             | 8             | 0           | -1.333704               | 2.562921  | -0.738491 |
| 4             | 6             | 0           | -0.086257               | 2.458609  | -1.531554 |
| 5             | 6             | 0           | -0.296487               | 1.486466  | -2.771963 |
| 6             | 8             | 0           | -0.356671               | 2.360009  | -3.950481 |
| 7             | 6             | 0           | -1.583774               | 0.537982  | -2.631054 |
| 8             | 1             | 0           | -2.478749               | 1.141893  | -2.404430 |
| 9             | 6             | 0           | -1.684617               | -0.207642 | -3.974702 |
| 10            | 6             | 0           | -0.603317               | -0.936510 | -4.298872 |
| 11            | 6             | 0           | 0.480726                | -1.011099 | -3.204397 |
| 12            | 1             | 0           | 1.336305                | -1.642356 | -3.496681 |
| 13            | 6             | 0           | -0.284346               | -1.589554 | -1.939585 |
| 14            | 6             | 0           | -1.239642               | -0.442593 | -1.437049 |
| 15            | 1             | 0           | -0.675273               | 0.165996  | -0.707300 |
| 16            | 6             | 0           | -2.429693               | -1.053364 | -0.596350 |
| 17            | 6             | 0           | -3.380104               | -2.007927 | -1.440382 |
| 18            | 8             | 0           | -4.506513               | -2.451505 | -0.589035 |
| 19            | 6             | 0           | -5.678017               | -1.669084 | -0.865535 |
| 20            | 6             | 0           | -6.813055               | -2.074139 | 0.082228  |
| 21            | 6             | 0           | -8.076318               | -1.454039 | -0.076706 |
| 22            | 6             | 0           | -9.144522               | -1.794623 | 0.773009  |
| 23            | 6             | 0           | -8.957290               | -2.756821 | 1.787760  |
| 24            | 6             | 0           | -7.700933               | -3.377318 | 1.951358  |
| 25            | 6             | 0           | -6.630125               | -3.038543 | 1.102745  |
| 26            | 8             | 0           | -5.748537               | -0.810023 | -1.777873 |
| 27            | 8             | 0           | -3.253316               | -0.053085 | 0.076488  |
| 28            | 6             | 0           | -1.684070               | -1.817671 | 0.597827  |
| 29            | 8             | 0           | -2.061398               | -1.474934 | 1.753138  |
| 30            | 6             | 0           | -0.493888               | -2.773331 | 0.290666  |
| 31            | 6             | 0           | 0.544862                | -2.137684 | -0.719016 |
| 32            | 16            | 0           | 1.784179                | -3.454407 | -1.100487 |
| 33            | 6             | 0           | 3.297582                | -2.483226 | -1.474128 |
| 34            | 6             | 0           | 3.851960                | -1.511023 | -0.365005 |
| 35            | 1             | 0           | 3.770360                | -1.975110 | 0.637728  |
| 36            | 7             | 0           | 3.066698                | -0.238022 | -0.388055 |
| 37            | 6             | 0           | 2.690187                | 0.615688  | 0.683507  |
| 38            | 6             | 0           | 3.181256                | 0.192997  | 2.133675  |
| 39            | 1             | 0           | 3.141100                | -0.907282 | 2.248960  |
| 40            | 6             | 0           | 2.281353                | 0.868982  | 3.222646  |
| 41            | 6             | 0           | 0.962950                | 0.063953  | 3.438800  |

|    |   |   |            |           |           |
|----|---|---|------------|-----------|-----------|
| 42 | 6 | 0 | -0.008023  | 0.756607  | 4.443335  |
| 43 | 6 | 0 | -1.262733  | -0.130253 | 4.720246  |
| 44 | 7 | 0 | -2.283250  | 0.643404  | 5.548377  |
| 45 | 7 | 0 | 4.657587   | 0.577105  | 2.239570  |
| 46 | 8 | 0 | 2.003217   | 1.659431  | 0.486353  |
| 47 | 6 | 0 | 5.402392   | -1.220179 | -0.661793 |
| 48 | 7 | 0 | 6.120051   | -0.753737 | 0.520817  |
| 49 | 6 | 0 | 7.509365   | -0.226626 | 0.228209  |
| 50 | 1 | 0 | 7.727772   | -0.489464 | -0.829769 |
| 51 | 6 | 0 | 7.693119   | 1.320939  | 0.437399  |
| 52 | 6 | 0 | 9.187238   | 1.691545  | 0.171869  |
| 53 | 6 | 0 | 6.732069   | 2.143296  | -0.477651 |
| 54 | 6 | 0 | 8.470756   | -1.101960 | 1.191019  |
| 55 | 8 | 0 | 7.736675   | -2.116309 | 1.791686  |
| 56 | 8 | 0 | 9.701586   | -0.912880 | 1.378579  |
| 57 | 8 | 0 | 5.947613   | -1.417368 | -1.774430 |
| 58 | 6 | 0 | 0.938296   | 0.465474  | -2.869445 |
| 59 | 8 | 0 | 2.126935   | 0.809314  | -2.641245 |
| 60 | 6 | 0 | -3.237585  | 3.921610  | -0.091852 |
| 61 | 6 | 0 | -3.810182  | 5.193204  | 0.159744  |
| 62 | 6 | 0 | -5.038169  | 5.297633  | 0.836333  |
| 63 | 6 | 0 | -5.703704  | 4.128524  | 1.260617  |
| 64 | 6 | 0 | -5.138869  | 2.862458  | 1.002779  |
| 65 | 6 | 0 | -3.906768  | 2.744010  | 0.327489  |
| 66 | 1 | 0 | 0.731203   | 2.098952  | -0.849829 |
| 67 | 1 | 0 | 0.164742   | 3.468579  | -1.923563 |
| 68 | 1 | 0 | -0.586779  | 1.690021  | -4.696432 |
| 69 | 1 | 0 | -2.565778  | -0.089258 | -4.618760 |
| 70 | 1 | 0 | -0.484056  | -1.504798 | -5.230685 |
| 71 | 1 | 0 | -0.886811  | -2.429854 | -2.325660 |
| 72 | 1 | 0 | -3.781327  | -1.443188 | -2.309082 |
| 73 | 1 | 0 | -2.851940  | -2.919424 | -1.783155 |
| 74 | 1 | 0 | -8.203320  | -0.706506 | -0.872861 |
| 75 | 1 | 0 | -10.123083 | -1.311665 | 0.646399  |
| 76 | 1 | 0 | -9.791123  | -3.023089 | 2.452050  |
| 77 | 1 | 0 | -7.557103  | -4.125784 | 2.742608  |
| 78 | 1 | 0 | -5.647123  | -3.514425 | 1.221460  |
| 79 | 1 | 0 | -3.057212  | -0.353634 | 1.061676  |
| 80 | 1 | 0 | 0.001453   | -3.040352 | 1.240130  |
| 81 | 1 | 0 | 1.065968   | -1.296623 | -0.227907 |
| 82 | 1 | 0 | 3.196087   | -1.900673 | -2.407048 |
| 83 | 1 | 0 | 4.073926   | -3.244508 | -1.663944 |
| 84 | 1 | 0 | 2.830450   | 0.134315  | -1.357887 |
| 85 | 1 | 0 | 2.048251   | 1.895274  | 2.888050  |
| 86 | 1 | 0 | 2.840017   | 0.928806  | 4.173289  |
| 87 | 1 | 0 | 1.215750   | -0.944874 | 3.809773  |

|     |   |   |           |           |           |
|-----|---|---|-----------|-----------|-----------|
| 88  | 1 | 0 | 0.448338  | -0.060226 | 2.470415  |
| 89  | 1 | 0 | 0.518121  | 0.953961  | 5.394014  |
| 90  | 1 | 0 | -0.332838 | 1.728766  | 4.034329  |
| 91  | 1 | 0 | -0.936594 | -1.074018 | 5.208473  |
| 92  | 1 | 0 | -1.741515 | -0.405720 | 3.759846  |
| 93  | 1 | 0 | -1.818469 | 0.751890  | 6.498000  |
| 94  | 1 | 0 | -3.035735 | -0.074879 | 5.765888  |
| 95  | 1 | 0 | 4.968694  | 0.350619  | 3.223690  |
| 96  | 1 | 0 | 4.717016  | 1.630227  | 2.182509  |
| 97  | 1 | 0 | 5.500655  | -0.142027 | 1.246585  |
| 98  | 1 | 0 | 7.457772  | 1.552963  | 1.493928  |
| 99  | 1 | 0 | 9.403618  | 1.654470  | -0.906428 |
| 100 | 1 | 0 | 9.821305  | 0.947300  | 0.688461  |
| 101 | 1 | 0 | 9.407838  | 2.704329  | 0.540156  |
| 102 | 1 | 0 | 6.943599  | 1.938711  | -1.538401 |
| 103 | 1 | 0 | 6.869003  | 3.220816  | -0.298392 |
| 104 | 1 | 0 | 5.680098  | 1.889580  | -0.278557 |
| 105 | 1 | 0 | 6.781765  | -1.839372 | 1.375439  |
| 106 | 1 | 0 | -3.276944 | 6.091920  | -0.181825 |
| 107 | 1 | 0 | -5.476959 | 6.285211  | 1.032922  |
| 108 | 1 | 0 | -6.664156 | 4.205524  | 1.788963  |
| 109 | 1 | 0 | -5.666952 | 1.956271  | 1.330316  |
| 110 | 1 | 0 | -3.486415 | 1.728963  | 0.122802  |
| 111 | 1 | 0 | -0.905036 | -3.700521 | -0.152544 |

---

**Table S15.** Binding energy (kcal/mol) results of the top scoring compounds **8**, **14**, **15** and **16**.

| Complex Name                                                               | MMGBSA       |               |             |               |                  |
|----------------------------------------------------------------------------|--------------|---------------|-------------|---------------|------------------|
|                                                                            | $\Delta$ vdW | $\Delta$ elec | $\Delta$ ps | $\Delta$ SASA | $\Delta$ G Total |
| 3-(3,4-dihydroxy benzyl)-3',4',6-trihydroxy-2,4-dimethoxychalcone (8)-AChE | -62.35       | -15.12        | 40.45       | -34.69        | -77.46           |
| bractelactone (14)-PDE4 B2B                                                | -54.83       | -11.80        | 12.27       | -31.03        | -66.64           |
| grandifloracin (15)-KEAP1 (BTB)                                            | -54.37       | -8.21         | 22.24       | -29.14        | -48.41           |
| dichamanetin (16)-KEAP1 (Kelch)                                            | -50.57       | -5.19         | 30.02       | -27.68        | -55.76           |
| dichamanetin (16)-USP14                                                    | -66.60       | -17.38        | 37.30       | -31.94        | -83.98           |

**vdW** = van der Waals energy; **elec**= electrostatic energy; **ps** = polar solvation energy; **SASA** = solvent-accessible surface area energy; **G Total** = total binding free energy; **MMGBSA** = molecular mechanics generalized Born solvent accessibility

**Table S16.** Input parameters for molecular dynamics simulation used in this study.

|                                                                                                                                                                                                                                                                                                                             |                                                                                                                                                                                                                                                                                                                                                   |                                                                                                                                                                                                                                                                                              |
|-----------------------------------------------------------------------------------------------------------------------------------------------------------------------------------------------------------------------------------------------------------------------------------------------------------------------------|---------------------------------------------------------------------------------------------------------------------------------------------------------------------------------------------------------------------------------------------------------------------------------------------------------------------------------------------------|----------------------------------------------------------------------------------------------------------------------------------------------------------------------------------------------------------------------------------------------------------------------------------------------|
| <p style="text-align: center;"><b>Minimization 1</b></p> <p>Initial minimization of MMP3<br/>(MMMM): solvent molecules and added ions</p> <pre>&amp;cntrl imin = 1, maxcyc = 6000, ncyc = 3000, ntb = 1, ntr = 1, cut = 12.0, /</pre>                                                                                       | <p style="text-align: center;"><b>Minimization 2</b></p> <p>Full minimization of MMP3<br/>(MMMM): protein, ligand, solvent molecules and added ions</p> <pre>&amp;cntrl imin = 1, maxcyc = 3000, ncyc = 1000, ntb = 1, ntr = 0, cut = 12.0, Drms = 0.0001, / END</pre>                                                                            | <p style="text-align: center;"><b>Heating</b></p> <p>Heating Step of MMP3 (MMMM):<br/>stage-5</p> <pre>&amp;cntrl imin=0, irest=1, NTX=1, ntb= 1, NTPR=500, NTWX=500, NTWR=500, ntr=1, Tempi=0.0, Temp0=300.0, NTT=3, gamma_ln=1.0, NTC=2, NTF=2, cut= 12.0, nstlim=10000, dt=0.002, /</pre> |
| <p style="text-align: center;"><b>Equilibration</b></p> <p>Equilibration Step of MMP3<br/>(MMMM): stage-1</p> <pre>&amp;cntrl imin= 0, irest=1, NTX=7, ntb=2, ntp=1, PRES0=1.0, TAUP=2.0, NTPR=500, NTWX=500, ntr=0, Tempi=300.0, Temp0=300.0, NTT=3, gamma_ln=1.0, NTC=2, NTF=2, cut=12.0, nstlim=250000, dt=0.002 /</pre> | <p style="text-align: center;"><b>Production</b></p> <p>Equilibration Step of MMP3<br/>(MMMM): stage-1</p> <pre>&amp;cntrl imin=0, irest=0, ig=-1, NTX=7, ntxo=2, ioutfm=1, ntb=2, ntp=1, PRES0=1.0, TAUP=2.0, NTPR=500, NTWX=500, ntr=0, Tempi=300.0, Temp0=300.0, NTT=3, gamma_ln=1.0, NTC=2, NTF=2, cut=12.0, nstlim=2500000, dt=0.002 /</pre> |                                                                                                                                                                                                                                                                                              |



**Table S17.** The hydrogen bonding occupancy of the key residues during the course of simulation. Each residue bonding is given in percentage trajectories.

| <b>Complex name</b>             | <b>Residues &amp; H-Bonding lifetime</b> |               |               |               |               |            |
|---------------------------------|------------------------------------------|---------------|---------------|---------------|---------------|------------|
| <b>Bractelactone_PDE4B2B</b>    | <b>Tyr233</b>                            | <b>His238</b> | <b>His274</b> | <b>Asn283</b> | <b>Met347</b> | <b>***</b> |
|                                 | 0.89                                     | 0.82          | 0.47          | 0.62          | 0.77          | <b>***</b> |
| <b>Dimethoxychalcone_AChE</b>   | <b>Asp74</b>                             | <b>Tyr124</b> | <b>Glu202</b> | <b>Ser293</b> | <b>Arg296</b> | <b>***</b> |
|                                 | 0.69                                     | 0.33          | 0.82          | 0.92          | 0.69          | <b>***</b> |
| <b>Dichamanetin_KEAP1-KELCH</b> | <b>Ser363</b>                            | <b>Asn414</b> | <b>Arg415</b> | <b>Tyr436</b> | <b>***</b>    | <b>***</b> |
|                                 | 0.26                                     | 0.56          | 0.54          | 0.94          | <b>***</b>    | <b>***</b> |
| <b>Grandifloracin_KEAP1-BTB</b> | <b>Ala88</b>                             | <b>His129</b> | <b>Pro130</b> | <b>Lys131</b> | <b>Arg135</b> | <b>***</b> |
|                                 | 0.28                                     | 0.66          | 0.70          | 0.83          | 0.52          | <b>***</b> |
| <b>Dichamanetin_USP14</b>       | <b>Arg415</b>                            | <b>Ile416</b> | <b>His426</b> | <b>***</b>    | <b>***</b>    | <b>***</b> |
|                                 | 0.67                                     | 0.73          | 0.52          | <b>***</b>    | <b>***</b>    | <b>***</b> |

**Table S18.** Lipinski's rule of five for ADME analysis of compounds **1–18**.

| Compound  | Lipinski's Rule of Five     |                          |                  |                     |                    | Drug-likeness |
|-----------|-----------------------------|--------------------------|------------------|---------------------|--------------------|---------------|
|           | Molecular weight<br>(g/mol) | Lipophilicity<br>(MLogP) | H-bond<br>donors | H-bond<br>acceptors | Rule<br>violations |               |
|           | < 500                       | < 5                      | < 5              | < 10                | < 2                |               |
| <b>1</b>  | 266.25                      | 2.88                     | 0                | 4                   | 0                  | yes           |
| <b>2</b>  | 408.40                      | 2.62                     | 0                | 7                   | 0                  | yes           |
| <b>3</b>  | 386.40                      | 1.84                     | 3                | 7                   | 0                  | yes           |
| <b>4</b>  | 386.40                      | 1.84                     | 3                | 7                   | 0                  | yes           |
| <b>5</b>  | 302.28                      | 0.89                     | 0                | 6                   | 0                  | yes           |
| <b>6</b>  | 310.34                      | 3.83                     | 0                | 4                   | 0                  | yes           |
| <b>7</b>  | 436.45                      | 1.00                     | 1                | 7                   | 0                  | yes           |
| <b>8</b>  | 438.43                      | 1.26                     | 5                | 8                   | 1                  | yes           |
| <b>9</b>  | 446.88                      | 3.22                     | 1                | 7                   | 0                  | yes           |
| <b>10</b> | 314.33                      | 1.75                     | 1                | 5                   | 0                  | yes           |
| <b>11</b> | 422.43                      | 0.80                     | 2                | 7                   | 0                  | yes           |
| <b>12</b> | 376.40                      | 2.33                     | 2                | 5                   | 0                  | yes           |
| <b>13</b> | 528.55                      | 3.75                     | 0                | 8                   | 1                  | yes           |
| <b>14</b> | 416.42                      | 2.60                     | 2                | 6                   | 0                  | yes           |
| <b>15</b> | 488.49                      | 1.89                     | 2                | 8                   | 0                  | yes           |
| <b>16</b> | 468.50                      | 2.79                     | 4                | 6                   | 0                  | yes           |
| <b>17</b> | 390.86                      | 2.66                     | 2                | 5                   | 0                  | yes           |
| <b>18</b> | 436.45                      | 1.00                     | 1                | 7                   | 0                  | yes           |

**Table S19.** Predicted toxicity parameters of compounds **1–18**.

| Compound  | Mutagenicity | Tumorigenicity | Irritant Effect | Reproductive Toxicity |
|-----------|--------------|----------------|-----------------|-----------------------|
| <b>1</b>  | None         | None           | None            | High Risk             |
| <b>2</b>  | None         | None           | None            | High Risk             |
| <b>3</b>  | None         | None           | High Risk       | Medium Risk           |
| <b>4</b>  | None         | None           | High Risk       | Medium Risk           |
| <b>5</b>  | None         | None           | High Risk       | None                  |
| <b>6</b>  | None         | None           | High Risk       | None                  |
| <b>7</b>  | None         | None           | None            | None                  |
| <b>8</b>  | None         | None           | None            | None                  |
| <b>9</b>  | None         | None           | High Risk       | High Risk             |
| <b>10</b> | None         | None           | None            | None                  |
| <b>11</b> | None         | None           | None            | None                  |
| <b>12</b> | None         | Medium Risk    | None            | Medium Risk           |
| <b>13</b> | None         | None           | High Risk       | None                  |
| <b>14</b> | None         | None           | None            | High Risk             |
| <b>15</b> | None         | None           | High Risk       | Medium Risk           |
| <b>16</b> | None         | Medium Risk    | None            | Medium Risk           |
| <b>17</b> | None         | None           | High Risk       | High Risk             |
| <b>18</b> | None         | None           | None            | None                  |

**Table S20.** Docking grid coordinates and active residues of the protein binding site.

| Enzyme<br>(PDB ID)    | Coordinates |       |       | Active Residues                                                                                |
|-----------------------|-------------|-------|-------|------------------------------------------------------------------------------------------------|
|                       | x           | y     | z     |                                                                                                |
| PDE4B<br>(1RO6)       | 33.0        | 75.0  | 23.0  | Tyr 233, His234, His238, His274,<br>Asp275, Asp392, Ans395, Tyr403,<br>Ile410, Glu413, Gln443, |
| AChE<br>(4EY6)        | -10.0       | -43.0 | 30.0  | Trp86, Glu202, Ser203, Gly120, Gly121,<br>Gly122, Phe295, Phe297, Tyr337,<br>His447            |
| USP14<br>(6IIM)       | -18.0       | 18.0  | -4.0  | His426, Tyr436, and Tyr476                                                                     |
| KEAP1-Kelch<br>(4L7B) | -2.0        | 5.0   | -29.0 | Tyr334, Ser 363, Arg380, Asn414,<br>Arg415, Ser 508, Ser555, Tyr572, Ser602                    |
| KEAP1-BTB<br>(5DAD)   | -25.0       | -5.0  | 10.0  | His129, Lys131, Arg135, His154,<br>Cys151                                                      |

**Table S21.** RMSD analysis of co-crystallized ligand and its re-docked structure.

| Enzyme<br>(PDB<br>ID) | Co-crystallized Ligand |                                                                                           | Superimposition of Co-crystal (blue)<br>and Re-docked (red) Structures               | RMSD<br>(Å) |
|-----------------------|------------------------|-------------------------------------------------------------------------------------------|--------------------------------------------------------------------------------------|-------------|
|                       | Code                   | Name                                                                                      |                                                                                      |             |
| PDE4B<br>(1RO6)       | ROL                    | Rolipram                                                                                  | 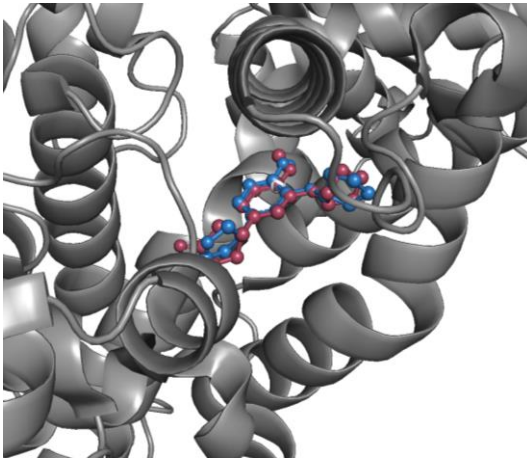   | 0.839       |
| AChE<br>(4EY6)        | GNT                    | (-)-Galantamine                                                                           |   | 0.157       |
| USP14<br>(6IIM)       | A8L                    | 1-[1-(4-chlorophenyl)-2,5-dimethyl-1H-pyrrol-3-yl]-2-(4-hydroxypiperidin-1-yl)ethan-1-one |  | 0.495       |

|                                    |            |                                                                                                                                                 |                                                                                     |              |
|------------------------------------|------------|-------------------------------------------------------------------------------------------------------------------------------------------------|-------------------------------------------------------------------------------------|--------------|
| <p>KEAP1<br/>-Kelch<br/>(4L7B)</p> | <p>1VV</p> | <p>(1S,2R)-2-[[[(1S)-1-[(1,3-dioxo-1,3-dihydro-2H-isoindol-2-yl) methyl]-3,4-dihydroisoquinolin-2(1H)yl]carbonyl}cyclohexanecarboxylic acid</p> | 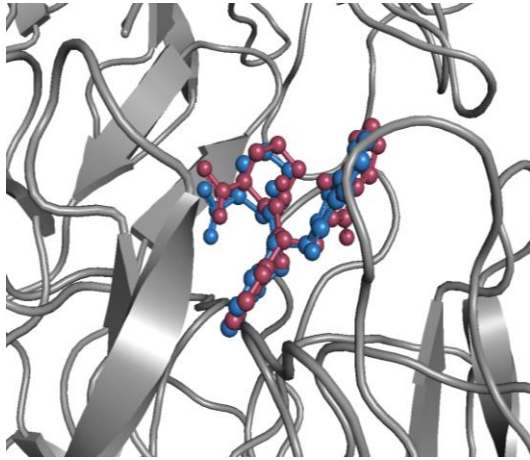  | <p>1.511</p> |
| <p>KEAP1<br/>-BTB<br/>(5DAD)</p>   | <p>TX6</p> | <p>(6aS,7S,10aS)-8-hydroxy-4-methoxy-2,7,10a-trimethyl-5,6,6a,7,10,10a-hexahydrobenzo[h]quinazoline-9-carbonitrile</p>                          |  | <p>0.473</p> |

## REFERENCES:

- (1) Awale, S.; Ueda, J. Y.; Athikomkulchai, S.; Abdelhamed, S.; Yokoyama, S.; Saiki, I.; Miyatake, R. Antiausterity agents from *Uvaria dac* and their preferential cytotoxic activity against human pancreatic cancer cell lines in a nutrient-deprived condition. *J. Nat. Prod.* **2012**, *75*, 1177–1183, DOI: 10.1021/np300295h
- (2) Macabeo, A. P. G.; Lopez, A. D. A.; Schmidt, S.; Heilmann, J.; Dahse, H. M.; Alejandro, G. J. D.; Franzblau, S. G. Antitubercular and cytotoxic constituents from *Goniothalamus gitingensis*. *Rec. Nat. Prod.* **2014**, *8*, 41–45.
- (3) Macabeo, A. P. G.; Letada, A. G.; Budde, S.; Faderl, C.; Dahse, H. M.; Franzblau, S. G.; Alejandro, G. J. D.; Pierens, G. K.; Garson, M. J. Antitubercular and cytotoxic chlorinated seco-cyclohexenes from *Uvaria alba*. *J. Nat. Prod.* **2017**, *80*, 3319–3323, DOI: 10.1021/acs.jnatprod.7b00679
- (4) Ichimaru, M.; Nakatani, N.; Moriyasu, M.; Nishiyama, Y.; Kato, A.; Mathenge, S. G.; Juma, F. D.; ChaloMutiso, P. B. Hydroxyespintanol and schefflerichalcone: two new compounds from *Uvaria scheffleri*. *J. Nat. Med.* **2010**, *64*, 75–79, DOI: 10.1007/s11418-009-0358-0
- (5) Vasas, A.; Lajter, I.; Kúsz, N.; Forgó, P.; Jakab, G.; Fazakas, C.; Wilhelm, I.; Krizbai, I. A.; Hohmann, J. Flavonoid, stilbene and diarylheptanoid constituents of *Persicaria maculosa* Gray and cytotoxic activity of the isolated compounds. *Fitoterapia* **2020**, *145*, 104610, DOI: 10.1016/j.fitote.2020.104610
- (6) Wu, Y. C.; Sureshbabu, M.; Fang, Y. C.; Wu, Y. H.; Lan, Y. H.; Chang, F. R.; Chang, Y. W.; Hwang, T. L. Potent inhibition of human neutrophil activations by bractelactone, a novel chalcone from *Fissistigma bracteolatum*. *Toxicol. Appl. Pharmacol.* **2013**, *266*, 399–407, DOI: 10.1016/j.taap.2012.11.021
- (7) Alexander, B. E.; Sun, S.; Palframan, M. J.; Kociok-Köhn, G.; Dibwe, D. F.; Watanabe, S.; Caggiano, L.; Awale, S.; Lewis, S. E. Sidechain diversification of grandifloracin allows identification of analogues with enhanced anti-austerity activity against human PANC-1 pancreatic cancer cells. *ChemMedChem* **2020**, *15*, 125–135, DOI: 10.1002/cmdc.201900549
- (8) Matthew, S.; Pan, L.; Shen, Q.; Kinghorn, A. D.; Swanson, S. M.; Carcache de Blanco, E. J. Dichamanetin, a *C*-benzylated flavonoid from *Piper sarmentosum* inhibits cell growth and induces G1 cell cycle arrest in cancer cells through mitochondrial-mediated apoptosis. *Cancer Res.* **2011**, 4229–4229, DOI: 10.1158/1538-7445.am2011-4229
- (9) Yong, Y.; Matthew, S.; Wittwer, J.; Pan, L.; Shen, Q.; Kinghorn, A. D.; Swanson, S. M.; Carcache De Blanco, E. J. Dichamanetin inhibits cancer cell growth by affecting ros-related signaling components through mitochondrial-mediated apoptosis. *Anticancer Res.* **2013**, *33*, 5349–5355.
- (10) Sablé, S.; Païs, M.; Hamid, A.; Guittet, E. Cyathoviridine, a cytotoxic metabolite from *Cyathostemma viridiflorum*. *Nat. Prod. Lett.* **1993**, *3*, 245–249, DOI: 10.1080/10575639308043872
